# Supplementary material for: Global gridded NO x emissions using TROPOMI observations
Source: Copernicus journal article supplement (doi:10.5194/essd-2024-410), 2024-10-30
Supplement: Supplementary file 1 [file essd-2024-410-supplement.pdf]

# Supplementary Materials for **Global gridded NO<sub>x</sub> emissions using TROPOMI observations**

Anthony Rey-Pommier<sup>1,2</sup>, Alexandre Héraud<sup>1</sup>, Frédéric Chevallier<sup>1</sup>, Philippe Ciais<sup>1,2</sup>, Theodoros Christoudias<sup>2</sup>, Jonilda Kushta<sup>2</sup>, and Jean Sciare<sup>2</sup>

<sup>1</sup>Laboratoire des Sciences du Climat et de l'Environnement, LSCE/IPSL, CEA-CNRS-UVSQ, Université Paris-Saclay, 91198 Gif-sur-Yvette, France  
<sup>2</sup>The Cyprus Institute, Climate and Atmosphere Research Center, 2121 Nicosia, Cyprus

Correspondence: Anthony Rey-Pommier ([anthony.rey-pommier@lsce.ipsl.fr](mailto:anthony.rey-pommier@lsce.ipsl.fr))

---

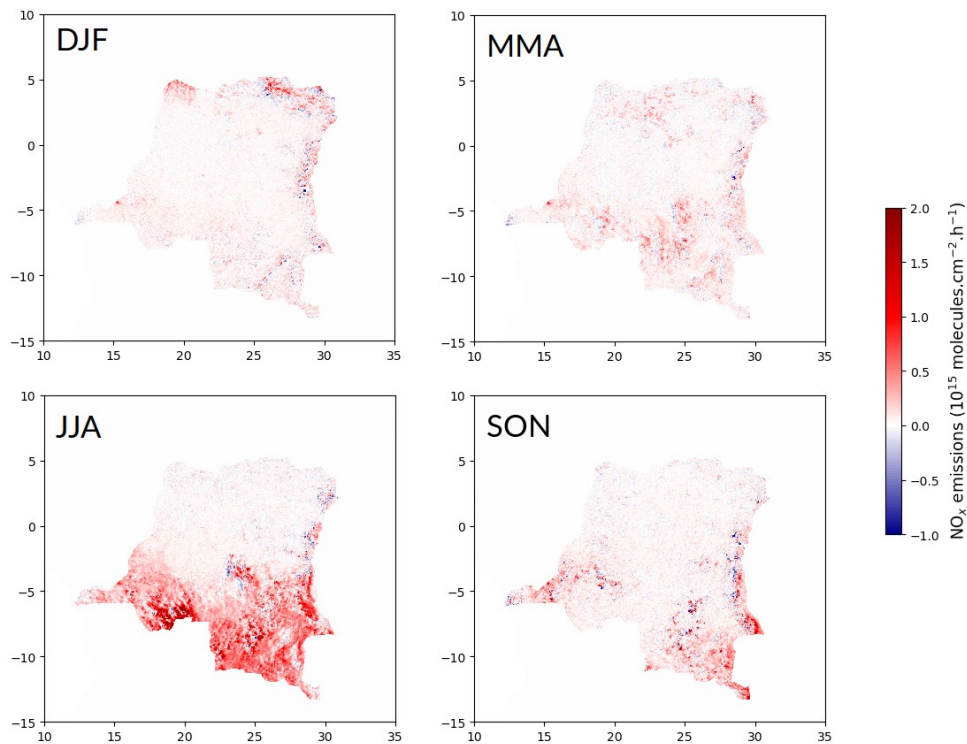

Fig. S1: TROPOMI-derived mean daytime NO<sub>x</sub> emission rates by period in 2022 for Congo (DRC) estimated with the flux-divergence method, showing high wildfire emissions in summer period.

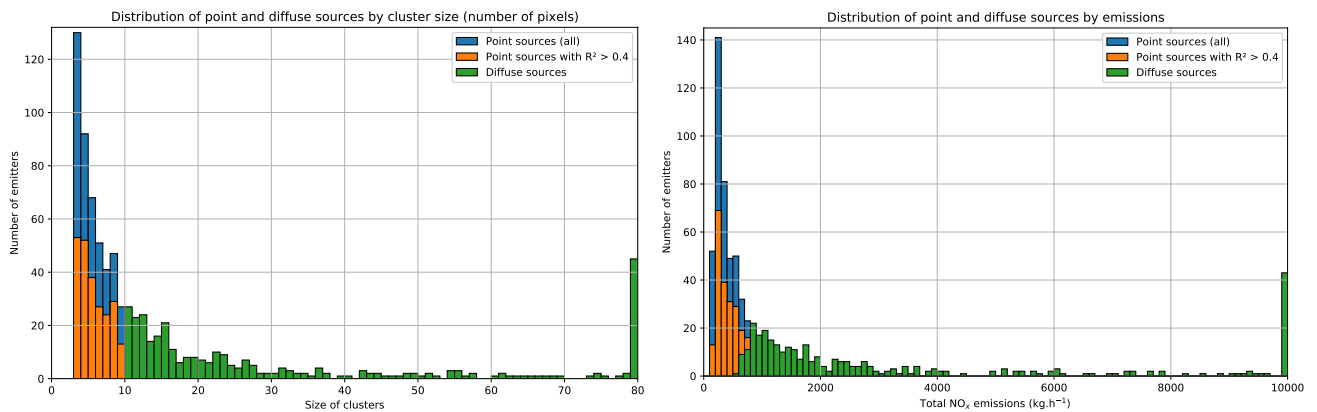

Fig. S2: Distribution of emitters by emissions (left) and cluster size (right), with a distinction between diffuse sources (more than 10 pixels, green) and point sources (between 3 and 9 pixels, blue). Point sources with a Gaussian behaviour (2D Gaussian fit with  $R^2 > 0.4$ ) are displayed in orange.

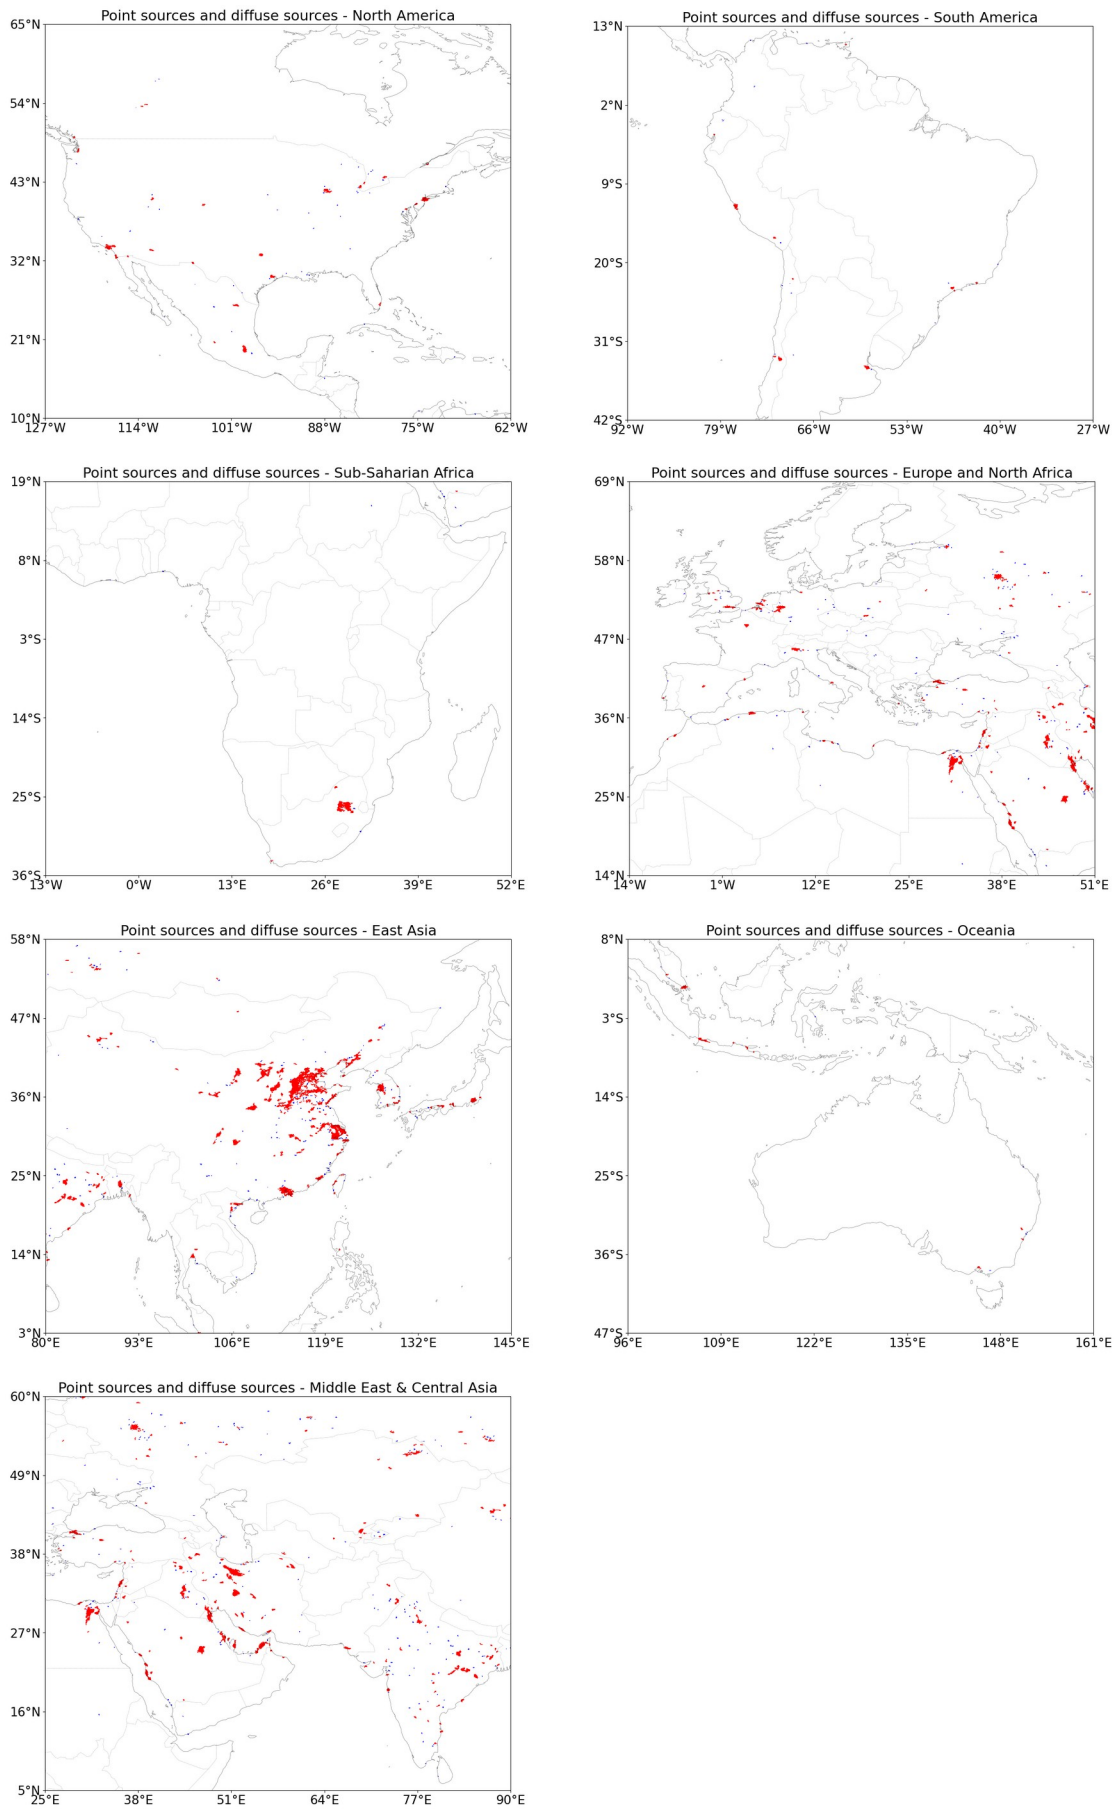

Fig. S3: Distribution of detected point sources (blue) and diffuse sources (red) in North America, South America, Sub-Saharan Africa, Europe and North Africa, East Asia, Oceania, Middle East and Central Asia.

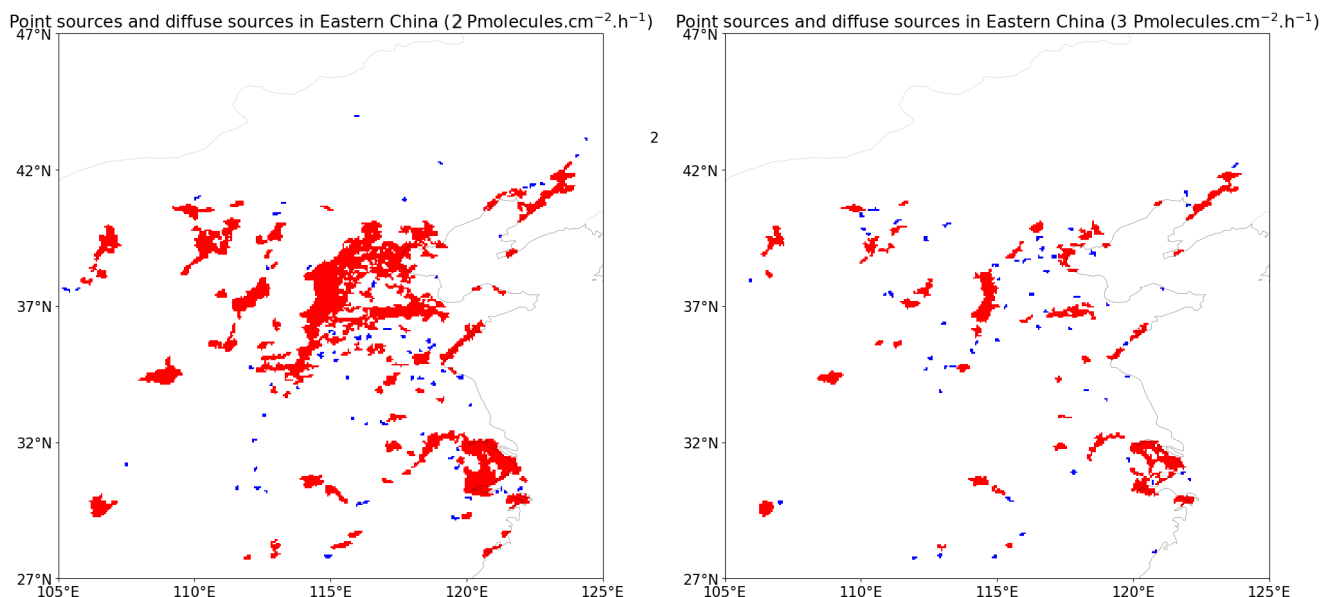

Fig. S4: Distribution of detected point sources (blue) and diffuse sources (red) in Eastern China (around Beijing) with cluster detection thresholds of  $2 \times 10^{15}$  molecules.cm<sup>-2</sup>.h<sup>-1</sup> and (left) and  $3 \times 10^{15}$  molecules.cm<sup>-2</sup>.h<sup>-1</sup> (right).

| Cluster size | Approx. latitude (°N) | Approx. longitude (°E) | Mean emission density (Pmolecules.cm <sup>-2</sup> .h <sup>-1</sup> ) | Total emissions (kg.h <sup>-1</sup> ) | Corresponding emitter                              | Type |
|--------------|-----------------------|------------------------|-----------------------------------------------------------------------|---------------------------------------|----------------------------------------------------|------|
| 2818         | 37.527                | 116.010                | 2.83                                                                  | 235026.7                              | Beijing, China                                     | URB  |
| 837          | 31.283                | 120.352                | 3.83                                                                  | 102011.4                              | Shanghai, China                                    | URB  |
| 439          | 35.549                | 51.329                 | 7.09                                                                  | 94188.2                               | Tehran, Iran                                       | URB  |
| 552          | -26.406               | 28.739                 | 4.27                                                                  | 78452.7                               | Gauteng mining sites, South Africa                 | MIN  |
| 425          | 22.798                | 113.630                | 3.72                                                                  | 54223.3                               | Shenzen & Hong-Kong, China                         | URB  |
| 361          | 29.653                | 31.126                 | 4.13                                                                  | 48158.0                               | Cairo & Beni Suef, Egypt                           | URB  |
| 303          | 29.582                | 47.874                 | 4.55                                                                  | 44642.6                               | Kuwait City, Kuwait                                | URB  |
| 172          | 24.649                | 46.797                 | 5.70                                                                  | 33116.2                               | Riyadh, Saudi Arabia                               | URB  |
| 198          | 32.771                | 44.298                 | 5.32                                                                  | 32939.2                               | Baghdad, Iraq                                      | URB  |
| 274          | 41.174                | 123.033                | 4.29                                                                  | 32876.9                               | Anshan, China                                      | URB  |
| 353          | 39.338                | 110.656                | 2.99                                                                  | 30320.2                               | Ordos mining sites, China                          | MIN  |
| 224          | 37.162                | 126.874                | 4.31                                                                  | 28632.8                               | Seoul, South Korea                                 | URB  |
| 171          | 25.316                | 55.342                 | 4.81                                                                  | 27652.5                               | Dubai, United Arab Emirates                        | URB  |
| 157          | 32.577                | 51.610                 | 4.86                                                                  | 23917.2                               | Ispahan, Iran                                      | URB  |
| 127          | 21.115                | 39.309                 | 4.92                                                                  | 21661.7                               | Jeddah, Saudi Arabia                               | URB  |
| 219          | 37.317                | 112.087                | 3.17                                                                  | 20559.1                               | Shanxi, China                                      | URB  |
| 180          | 55.715                | 37.501                 | 5.39                                                                  | 20346.3                               | Moscow, Russia                                     | URB  |
| 102          | 24.118                | 82.747                 | 5.53                                                                  | 19149.7                               | Uttar Pradesh & Madhya Pradesh mining sites, India | MIN  |
| 154          | 39.329                | 106.809                | 4.26                                                                  | 18867.6                               | Wuhai & Hainan industrial zones, China             | IND  |
| 83           | -12.183               | -76.853                | 6.19                                                                  | 18677.9                               | Lima, Peru                                         | URB  |
| 135          | 26.436                | 49.845                 | 4.01                                                                  | 18013.8                               | Damman industrial zone, Saudi Arabia               | IND  |
| 177          | 34.486                | 108.865                | 3.24                                                                  | 17574.4                               | Xi'an, China                                       | URB  |
| 111          | 19.653                | -99.161                | 4.48                                                                  | 17427.2                               | Mexico City, Mexico                                | URB  |
| 105          | 23.822                | 90.385                 | 4.73                                                                  | 16917.6                               | Dacca, Bangladesh                                  | URB  |
| 154          | 35.700                | 119.831                | 3.56                                                                  | 16566.7                               | Zhuhai, China                                      | URB  |
| 159          | 33.924                | -117.997               | 3.37                                                                  | 16559.9                               | Los Angeles, United States                         | URB  |
| 132          | 41.011                | 29.146                 | 4.39                                                                  | 16250.9                               | Istanbul, Türkiye                                  | URB  |
| 126          | 21.813                | 83.655                 | 3.58                                                                  | 15577.4                               | Odisha mining sites & MSP steel, India             | MIN  |
| 121          | 29.652                | 106.560                | 3.61                                                                  | 14135.3                               | Chongqing, China                                   | URB  |

|     |         |          |      |         |                                                                    |     |
|-----|---------|----------|------|---------|--------------------------------------------------------------------|-----|
| 178 | 51.261  | 6.994    | 3.40 | 14106.7 | Ruhr, Germany (and corresponding coal mining region)               | URB |
| 102 | 35.545  | 139.754  | 4.57 | 14099.5 | Tokyo, Japan                                                       | URB |
| 125 | 40.566  | -73.946  | 3.85 | 13592.8 | New-York City, United States                                       | URB |
| 85  | 25.334  | 51.462   | 4.33 | 12376.3 | Doha, Qatar                                                        | URB |
| 102 | 30.091  | 32.267   | 3.65 | 11990.0 | Steel plant (unknown name) & Suez, Egypt                           | STI |
| 94  | 33.924  | 35.527   | 4.11 | 11933.5 | Beyrouth, Lebanon                                                  | URB |
| 78  | 1.276   | 103.864  | 4.07 | 11803.3 | Singapore, Singapore                                               | URB |
| 91  | 30.746  | 104.162  | 4.01 | 11672.7 | Chengdu, China                                                     | URB |
| 78  | 21.023  | 106.815  | 4.24 | 11492.0 | Haiphong, Vietnam                                                  | URB |
| 101 | 28.748  | 77.165   | 3.42 | 11263.6 | Delhi, India                                                       | URB |
| 95  | 40.505  | 109.925  | 4.11 | 11037.2 | Baotou, China                                                      | URB |
| 92  | -6.075  | 106.528  | 3.15 | 10734.3 | Jakarta, Indonesia                                                 | URB |
| 77  | 29.888  | 121.862  | 4.19 | 10408.7 | Ningbo, China                                                      | URB |
| 100 | 52.150  | 76.740   | 4.52 | 10308.2 | Aluminium plants, Kazakhstan                                       | OTH |
| 90  | 24.650  | 118.251  | 3.38 | 10282.1 | Xiamen, China                                                      | URB |
| 75  | 41.222  | 69.107   | 4.62 | 9693.8  | Tachkent, Uzbekistan                                               | URB |
| 74  | 22.127  | 82.554   | 3.74 | 9533.0  | Atal Bihari Vajpayee Thermal Power Station, India                  | TPP |
| 65  | -34.617 | -58.551  | 4.76 | 9478.2  | Bueno Aires, Argentina                                             | URB |
| 74  | 30.578  | 114.323  | 3.94 | 9344.3  | Wuhan, China                                                       | URB |
| 104 | 41.743  | -87.636  | 3.23 | 9329.9  | Chicago, United States                                             | URB |
| 113 | 36.308  | 103.666  | 2.73 | 9254.9  | Lanzhou, China                                                     | URB |
| 57  | 27.503  | 52.463   | 4.88 | 9180.5  | Asaluyeh petrochemical complex, Iran                               | OTH |
| 73  | 36.671  | 3.084    | 4.18 | 9096.2  | Algiers, Algeria                                                   | URB |
| 92  | 34.783  | 50.737   | 3.13 | 8809.4  | Qom, Iran                                                          | URB |
| 54  | 24.858  | 67.189   | 4.71 | 8575.4  | Karachi, Pakistan                                                  | URB |
| 56  | 20.948  | 85.135   | 4.25 | 8276.6  | Anatapur mining sites & Kalikata Plant & JSPL, India               | MIN |
| 55  | 20.321  | 105.959  | 4.10 | 7869.2  | Ninh Binh industrial zone, Vietnam                                 | IND |
| 93  | 35.675  | 111.135  | 2.78 | 7808.8  | Unidentified, China                                                | UNK |
| 61  | -33.464 | -70.698  | 4.06 | 7680.6  | Santiago, Chile                                                    | URB |
| 63  | 36.282  | 59.518   | 4.06 | 7676.7  | Mechhed, Iran                                                      | URB |
| 68  | 31.410  | 74.115   | 3.41 | 7359.9  | Lahore, Pakistan                                                   | URB |
| 55  | 23.576  | 87.274   | 3.90 | 7313.3  | Durgapur steel plant, India                                        | STI |
| 42  | 22.560  | 39.082   | 5.02 | 7246.7  | NOMAC AL Mourjan Electricit Company & Arabian Cement, Saudi Arabia | TPP |
| 61  | 24.463  | 54.591   | 3.50 | 7235.1  | Abu Dhabi, United Arab Emirates                                    | URB |
| 64  | 35.238  | 129.030  | 3.61 | 7013.0  | Busan, South Korea                                                 | URB |
| 90  | 44.022  | 87.608   | 2.90 | 6970.7  | Urumqi, China                                                      | URB |
| 92  | 51.487  | -0.031   | 3.10 | 6614.4  | London, United Kingdom                                             | URB |
| 60  | 32.090  | 54.068   | 3.47 | 6551.8  | Yazd, Iran                                                         | URB |
| 49  | 37.930  | 46.212   | 4.26 | 6129.9  | Tabriz, Iran                                                       | URB |
| 55  | 13.771  | 100.529  | 3.06 | 6072.0  | Bangkok, Thailand                                                  | URB |
| 88  | 45.563  | 9.234    | 2.64 | 6051.0  | Milan, Italy                                                       | URB |
| 57  | 30.137  | 115.169  | 3.28 | 6009.0  | Huangshi, China                                                    | URB |
| 44  | 27.200  | 56.253   | 4.09 | 5960.8  | Bandar Abbas, Iran                                                 | URB |
| 67  | 51.897  | 75.605   | 3.84 | 5901.6  | Ekibastuz mining sites, Kazakhstan                                 | MIN |
| 54  | 21.436  | 81.789   | 3.10 | 5792.1  | Raipur Energen Ltd, India                                          | TPP |
| 54  | 34.684  | 135.216  | 3.43 | 5665.6  | Osaka, Japan                                                       | URB |
| 47  | 29.495  | 52.550   | 3.72 | 5663.8  | Shiraz, Iran                                                       | URB |
| 45  | 25.784  | -100.337 | 3.64 | 5482.2  | Monterrey, Mexico                                                  | URB |
| 52  | 36.121  | 43.918   | 3.49 | 5452.3  | Erbil, Iraq                                                        | URB |
| 62  | 35.078  | 118.343  | 2.82 | 5325.5  | Linyi, China                                                       | URB |
| 66  | 51.911  | 4.262    | 3.51 | 5316.9  | Rotterdam, Netherlands                                             | URB |
| 51  | 29.779  | -95.270  | 3.14 | 5165.8  | Houston, United States                                             | URB |

|    |         |          |      |        |                                                  |     |
|----|---------|----------|------|--------|--------------------------------------------------|-----|
| 44 | 31.976  | 36.001   | 3.70 | 5141.3 | Amman, Jordan                                    | URB |
| 69 | 39.699  | 113.025  | 2.60 | 5136.5 | Unidentified, China                              | UNK |
| 46 | 31.851  | 117.291  | 3.43 | 4991.1 | Hefei, China                                     | URB |
| 51 | 34.937  | 136.770  | 3.17 | 4925.7 | Nagoya, Japan                                    | URB |
| 31 | 23.924  | 38.297   | 4.20 | 4429.8 | Yanbu 3 power plant, Saudi Arabia                | TPP |
| 48 | 48.896  | 2.396    | 3.55 | 4161.5 | Paris, France                                    | URB |
| 27 | 32.795  | 13.156   | 4.88 | 4119.2 | Tripoli, Libya                                   | URB |
| 36 | 19.049  | 72.936   | 3.23 | 4092.8 | Mumbai, India                                    | URB |
| 24 | -23.659 | 27.508   | 4.94 | 4042.7 | Grootegeluk mining sites, South Africa           | MIN |
| 35 | 24.013  | 120.365  | 3.34 | 3970.6 | Changua, Taiwan/China                            | URB |
| 50 | 51.268  | 4.070    | 3.41 | 3969.4 | Antwerp, Belgium                                 | URB |
| 23 | 26.121  | 50.583   | 5.11 | 3923.3 | Manama, Bahrain                                  | URB |
| 39 | 28.083  | 112.969  | 3.05 | 3898.2 | Changsha, China                                  | URB |
| 34 | -23.568 | -46.636  | 3.28 | 3806.0 | Sao Paulo, Brazil                                | URB |
| 37 | 32.568  | -117.067 | 3.16 | 3663.8 | San Diego, United States & Tijuana, Mexico       | URB |
| 37 | 43.367  | 76.964   | 3.64 | 3644.4 | Almaty, Kazakhstan                               | URB |
| 49 | 35.429  | 116.686  | 2.45 | 3636.5 | Jining, China                                    | URB |
| 36 | 39.934  | 32.835   | 3.51 | 3607.3 | Ankara, Türkiye                                  | URB |
| 42 | 34.301  | 117.237  | 2.76 | 3563.5 | Gulou district, China                            | URB |
| 29 | 17.583  | 83.247   | 3.40 | 3499.7 | Visakhapatnam steel area, India                  | STI |
| 34 | 31.131  | 29.849   | 3.21 | 3478.4 | Alexandria, Egypt                                | URB |
| 42 | 59.906  | 30.335   | 4.39 | 3442.4 | Saint Petersburg, Russia                         | URB |
| 43 | 43.665  | -79.565  | 2.97 | 3437.2 | Toronto, Canada                                  | URB |
| 43 | 32.818  | -96.851  | 2.47 | 3321.1 | Dallas, United States                            | URB |
| 26 | 30.216  | 56.882   | 3.88 | 3244.8 | Cement plant (unknown name) & Kerman, Iran       | CEM |
| 32 | 28.225  | 115.420  | 3.08 | 3230.5 | Unidentified, China                              | UNK |
| 36 | 43.842  | 125.325  | 3.34 | 3222.3 | Changchun, China                                 | URB |
| 21 | 22.204  | 91.751   | 4.37 | 3159.1 | Chittagong, Bangladesh                           | URB |
| 25 | 34.044  | 49.679   | 4.08 | 3146.0 | Arak, Iran                                       | URB |
| 32 | 37.477  | 45.244   | 3.25 | 3072.8 | Ourmia, Iran                                     | URB |
| 48 | 53.842  | 87.250   | 2.82 | 2971.5 | Novokouznetsk industrial zone, Russia            | IND |
| 25 | 34.809  | 127.746  | 3.85 | 2936.6 | Gwangyang port, China                            | POR |
| 36 | 57.094  | 61.856   | 3.96 | 2880.0 | Mining sites (unknown name), Russia              | MIN |
| 40 | 41.141  | 121.864  | 2.56 | 2870.4 | Panjin, China                                    | URB |
| 33 | 28.020  | 120.865  | 2.65 | 2868.0 | Wenzhou, China                                   | URB |
| 24 | 29.500  | 51.719   | 3.68 | 2859.8 | Unidentified, Iran                               | UNK |
| 32 | 32.910  | 117.412  | 2.78 | 2781.7 | Bengbu, China                                    | URB |
| 26 | 33.550  | -7.596   | 3.41 | 2750.6 | Casablanca, Morocco                              | URB |
| 18 | 22.319  | 69.771   | 4.44 | 2750.3 | Industrial area (unknown name), India            | IND |
| 23 | 13.208  | 80.330   | 3.28 | 2735.0 | Chennai, India                                   | URB |
| 24 | -16.529 | -71.469  | 3.18 | 2723.8 | Arequipa & Mining sites, Peru                    | MIN |
| 26 | 38.168  | 106.599  | 3.55 | 2700.3 | Ningdongzhen industrial zone, China              | IND |
| 27 | 25.082  | 121.365  | 2.95 | 2682.3 | Taipei, Taiwan/China                             | URB |
| 28 | 33.638  | 72.942   | 3.05 | 2644.7 | Islamabad, Pakistan                              | URB |
| 23 | 26.279  | 43.980   | 3.41 | 2618.5 | Buraydah, Saudi Arabia                           | URB |
| 26 | 39.248  | 119.002  | 3.48 | 2608.0 | Jingtang port, China                             | POR |
| 18 | 18.774  | 79.458   | 4.00 | 2535.6 | Mining sites & Power plant (unknown name), India | MIN |
| 22 | 14.662  | 101.000  | 3.20 | 2531.8 | Siam Cement, Thailand                            | CEM |
| 33 | 37.421  | 116.365  | 2.59 | 2528.4 | Dezhou, China                                    | URB |
| 26 | 55.026  | 83.014   | 4.54 | 2515.3 | Novosibirsk, Russia                              | URB |
| 22 | -7.151  | 112.616  | 3.08 | 2497.1 | Surabaya, Indonesia                              | URB |
| 30 | 40.719  | 120.898  | 2.94 | 2484.1 | Huludao, China                                   | URB |

|    |         |          |      |        |                                                                    |     |
|----|---------|----------|------|--------|--------------------------------------------------------------------|-----|
| 27 | 33.450  | -112.131 | 2.94 | 2465.6 | Phoenix, United States                                             | URB |
| 19 | 21.423  | 39.834   | 3.73 | 2451.9 | Mecca, Saudi Arabia                                                | URB |
| 22 | 23.696  | 86.781   | 3.26 | 2445.9 | IISCO Steel Plant, India                                           | STI |
| 16 | 15.195  | 76.680   | 4.19 | 2405.0 | KPCL Ozonisation plant & JSW cement plant, India                   | TPP |
| 22 | 23.094  | 72.616   | 3.17 | 2384.7 | Ahmedabad, India                                                   | URB |
| 28 | 45.679  | 126.710  | 3.27 | 2382.8 | Harbin, China                                                      | URB |
| 23 | 31.330  | 48.765   | 3.25 | 2376.2 | Ahwaz, Iran                                                        | URB |
| 22 | 32.551  | 14.361   | 3.35 | 2308.0 | Leptis Cement & Zliten Cement, Libya                               | CEM |
| 31 | 42.338  | -83.019  | 2.71 | 2306.4 | Detroit, United States                                             | URB |
| 22 | 37.253  | 49.722   | 3.53 | 2301.5 | Rasht, Iran                                                        | URB |
| 21 | 24.713  | 74.665   | 3.24 | 2295.6 | Nuvoco Vistas Chittorgarh & JK Cement Works, India                 | CEM |
| 20 | 21.222  | 79.200   | 3.31 | 2292.5 | Nagpur, India                                                      | URB |
| 31 | 36.572  | 101.644  | 2.46 | 2277.2 | Xining, China                                                      | URB |
| 18 | 19.983  | 79.212   | 3.60 | 2262.7 | Maharashtra State Power Generation & Dhariwal Power Station, India | TPP |
| 23 | 38.944  | 121.637  | 3.40 | 2262.2 | Dalian, China                                                      | URB |
| 21 | 21.153  | 72.781   | 3.08 | 2246.2 | Surat, India                                                       | URB |
| 25 | 37.441  | 110.996  | 3.01 | 2221.0 | Liliang, China                                                     | URB |
| 16 | 11.555  | 79.484   | 3.76 | 2194.9 | Neyveli lignite mining sites, India                                | MIN |
| 27 | 39.406  | 112.434  | 2.73 | 2120.0 | Shuozhou, China                                                    | URB |
| 16 | 30.469  | 49.109   | 4.08 | 2092.8 | Mahshahr industrial zone, Iran                                     | IND |
| 30 | 47.406  | -122.348 | 2.75 | 2074.6 | Seattle, United States                                             | URB |
| 23 | 28.629  | 115.898  | 2.67 | 2008.5 | Nanchang, China                                                    | URB |
| 26 | 40.649  | -112.022 | 2.73 | 2004.5 | Salt Lake City, United States                                      | URB |
| 15 | 29.102  | 55.323   | 4.09 | 1992.5 | Golgohar Sirjan mining sites, Iran                                 | MIN |
| 19 | 31.676  | -106.387 | 3.29 | 1980.0 | El Paso, Mexico                                                    | URB |
| 29 | 52.389  | 4.749    | 2.99 | 1970.8 | Amsterdam, The Netherlands                                         | URB |
| 24 | 44.794  | 89.115   | 3.11 | 1969.3 | Gu'Erban Tonggute Shamo mining sites, China                        | MIN |
| 23 | 40.746  | 111.583  | 3.04 | 1968.6 | Hohhot, China                                                      | URB |
| 27 | 55.020  | 73.446   | 3.35 | 1926.2 | Omsk & CHP-5, Russia                                               | TPP |
| 14 | 24.518  | 56.571   | 4.06 | 1923.0 | Sohar power plant, Oman                                            | TPP |
| 24 | -37.813 | 145.003  | 2.71 | 1911.0 | Melbourne, Australia                                               | URB |
| 25 | 35.569  | 112.566  | 2.49 | 1884.3 | Yangcheng power station, China                                     | TPP |
| 15 | 28.456  | 36.552   | 3.84 | 1882.3 | Tabuk, Saudi Arabia                                                | URB |
| 23 | 40.401  | -3.637   | 2.88 | 1877.3 | Madrid, Spain                                                      | URB |
| 26 | 51.663  | 39.327   | 3.10 | 1857.2 | Voronej, Russia                                                    | URB |
| 31 | 50.259  | 19.051   | 2.51 | 1851.4 | Katowice, Poland                                                   | URB |
| 23 | 36.314  | 113.012  | 2.67 | 1837.4 | Power plant (unknown name), China                                  | TPP |
| 20 | 36.241  | 58.866   | 3.00 | 1797.6 | Nishapur, Iran                                                     | URB |
| 21 | 25.930  | -80.249  | 2.53 | 1775.4 | Miami, United States                                               | URB |
| 22 | 39.892  | -75.207  | 2.82 | 1770.0 | Philadelphia, United States                                        | URB |
| 22 | 38.065  | 58.327   | 2.71 | 1748.4 | Ashgabat, Turkmenistan                                             | URB |
| 17 | 22.531  | 88.259   | 2.98 | 1742.4 | Kolkatta, India                                                    | URB |
| 22 | 44.455  | 86.028   | 2.97 | 1735.5 | Shihezi, China                                                     | URB |
| 13 | 32.118  | 20.084   | 4.23 | 1734.0 | Benghazi, Libya                                                    | URB |
| 17 | 34.494  | 133.825  | 3.32 | 1730.9 | Okayama, Japan                                                     | URB |
| 14 | 31.982  | 44.946   | 3.92 | 1729.8 | Diwaniya, Iraq                                                     | URB |
| 21 | 23.552  | 116.674  | 2.40 | 1720.1 | Chaozhou, China                                                    | URB |
| 14 | 27.121  | 30.996   | 3.69 | 1711.8 | Asyut & Cemex Egypt, Egypt                                         | CEM |
| 15 | 22.790  | 86.215   | 3.33 | 1711.2 | Jamshedpur urban and industrial region, India                      | IND |
| 19 | 31.988  | 34.863   | 2.84 | 1704.5 | Tel Aviv, Israel                                                   | URB |
| 12 | 30.401  | 48.276   | 4.35 | 1675.1 | Khorramchahr & Abadan, Iran                                        | URB |
| 17 | -32.439 | 150.991  | 3.12 | 1666.4 | Muswellbrook to Brok coal mining sites, Australia                  | MIN |

|    |         |          |      |        |                                                                |     |
|----|---------|----------|------|--------|----------------------------------------------------------------|-----|
| 19 | 36.788  | 43.143   | 2.93 | 1660.8 | Unidentified, Iraq                                             | UNK |
| 15 | 36.806  | 10.223   | 3.70 | 1654.9 | Tunis, Tunisia                                                 | URB |
| 17 | -22.855 | -43.267  | 2.80 | 1629.3 | Rio de Janeiro, Brazil                                         | URB |
| 19 | 34.347  | 47.222   | 2.78 | 1622.2 | Kermanshah, Iran                                               | URB |
| 20 | 29.303  | 120.006  | 2.47 | 1605.5 | Beiyuan, China                                                 | URB |
| 18 | 25.375  | 56.354   | 2.62 | 1582.4 | Fujairah Power Plant, United Arab Emirates                     | TPP |
| 15 | 3.040   | 101.456  | 2.83 | 1578.2 | Kuala Lumpur, Malaysia                                         | URB |
| 18 | 21.059  | 105.917  | 2.52 | 1572.8 | Hanoi, Vietnam                                                 | URB |
| 15 | 40.423  | 49.885   | 3.68 | 1564.5 | Baku, Azerbaijan                                               | URB |
| 12 | 17.635  | 44.354   | 3.65 | 1554.2 | Unidentified, Saudi Arabia                                     | UNK |
| 16 | -33.098 | -71.453  | 3.10 | 1545.9 | Valparaíso & Viña del Mar & Quilpué, Chile                     | URB |
| 20 | 29.622  | 103.572  | 2.37 | 1534.8 | Unidentified, China                                            | UNK |
| 15 | 25.431  | 85.881   | 3.04 | 1530.8 | Barauni thermal power station, India                           | TPP |
| 22 | 39.790  | -104.886 | 2.43 | 1527.6 | Denver, United States                                          | URB |
| 18 | 37.563  | 121.198  | 2.87 | 1525.6 | Yantai, China                                                  | URB |
| 13 | 24.733  | 87.897   | 3.46 | 1521.3 | NTPC Farakka, India                                            | TPP |
| 20 | 49.978  | 73.156   | 3.13 | 1495.4 | ArcelorMittal Temirtau JSC, Kazakhstan                         | STI |
| 16 | 39.828  | 98.313   | 3.27 | 1495.2 | Mining sites (unknown name), China                             | MIN |
| 19 | 40.896  | 14.304   | 2.80 | 1493.9 | Naples, Italy                                                  | URB |
| 17 | 33.983  | 51.520   | 2.84 | 1489.0 | Kashan, Iran                                                   | URB |
| 20 | 37.913  | 106.025  | 2.52 | 1477.1 | Qingtongxia industrial zone & Wuzhong, China                   | IND |
| 13 | 22.550  | 120.329  | 3.31 | 1476.5 | Kaohsiung, Taiwan/China                                        | URB |
| 14 | 25.246  | 87.268   | 3.12 | 1471.4 | Kahalgaoon power station, India                                | TPP |
| 20 | 36.884  | 115.800  | 2.46 | 1466.6 | Power plant (unknown name), China                              | TPP |
| 15 | 37.356  | 57.969   | 3.24 | 1438.1 | Shirvan & Shirvan Combine Cycle Power Plant, Iran              | TPP |
| 15 | 16.806  | 79.923   | 2.63 | 1407.0 | Maha Cement Mellacheruvu & Rain Cements & Sagar Cements, India | CEM |
| 15 | 35.860  | 128.602  | 3.11 | 1406.8 | Daegu, South Korea                                             | URB |
| 16 | 31.477  | 104.742  | 2.76 | 1402.9 | Mianyang, China                                                | URB |
| 19 | 41.410  | 2.117    | 2.63 | 1393.7 | Barcelone, Spain                                               | URB |
| 11 | 16.327  | 77.361   | 3.54 | 1389.3 | ARV Cement society office & KPCL & Yermarus station, India     | CEM |
| 13 | 20.632  | -103.353 | 3.04 | 1374.2 | Guadalajara, Mexico                                            | URB |
| 14 | 38.022  | 23.634   | 3.29 | 1349.4 | Athens, Greece                                                 | URB |
| 16 | 31.332  | 119.785  | 2.65 | 1346.8 | Yixing & Dingshuzhen, China                                    | URB |
| 16 | 53.563  | 49.438   | 3.80 | 1342.0 | Togliatti, Russia                                              | URB |
| 17 | 55.193  | 61.447   | 3.70 | 1336.9 | Tcheliabinsk, Russia                                           | URB |
| 16 | 39.215  | -76.605  | 2.88 | 1327.2 | Baltimore, United States                                       | URB |
| 14 | 33.862  | 130.888  | 3.07 | 1326.3 | Kitakyūshū, Japan                                              | URB |
| 12 | 14.318  | 80.182   | 3.05 | 1318.7 | Sri Damodaram Sanjeevaiah power plant, India                   | TPP |
| 13 | 35.906  | 140.656  | 3.27 | 1280.2 | Kashima port, Japan                                            | POR |
| 13 | 33.478  | 36.281   | 3.14 | 1264.7 | Damascus, Syria                                                | URB |
| 11 | 24.378  | 88.116   | 3.37 | 1255.0 | Sagardighi Thermal Power Project & Sonar Bangla Cement, India  | TPP |
| 15 | -33.960 | 18.560   | 2.70 | 1251.3 | Cape Town, South Africa                                        | URB |
| 15 | 52.602  | 39.631   | 3.62 | 1227.9 | Lipetsk urban and industrial zone, Russia                      | IND |
| 15 | 28.648  | 121.423  | 2.50 | 1226.0 | Taizhou, China                                                 | URB |
| 14 | 35.777  | -0.290   | 2.90 | 1224.6 | Oran industrial zone, Algeria                                  | IND |
| 12 | 32.609  | -115.432 | 3.23 | 1214.4 | Mexicali, Mexico                                               | URB |
| 12 | 39.599  | 126.318  | 3.51 | 1207.0 | Beichanghua Power Station, North Korea                         | TPP |
| 14 | 42.978  | 90.121   | 3.17 | 1206.9 | Power plant (unknown name), China                              | TPP |
| 12 | 30.896  | 117.807  | 3.15 | 1205.4 | Xian de Tongling industrial zone, China                        | IND |
| 13 | 36.320  | 43.180   | 3.09 | 1202.5 | Mosul, Iraq                                                    | URB |
| 14 | 54.607  | 39.817   | 3.98 | 1200.1 | Riazan, Russia                                                 | URB |
| 14 | 53.223  | 76.629   | 3.85 | 1198.8 | Unidentified, Russia                                           | UNK |

|    |         |          |      |        |                                                                    |     |
|----|---------|----------|------|--------|--------------------------------------------------------------------|-----|
| 15 | 30.581  | 117.069  | 2.48 | 1189.8 | Anqing, China                                                      | URB |
| 10 | 14.650  | 121.081  | 3.28 | 1181.0 | Manilla, Philippines                                               | URB |
| 21 | 56.272  | 44.001   | 2.72 | 1178.5 | Nijni Novgorod, Russia                                             | URB |
| 18 | 59.135  | 38.000   | 3.42 | 1175.9 | Tcherepovets industrial zone, Russia                               | IND |
| 13 | 51.565  | 46.046   | 3.87 | 1162.4 | Saratov, Russia                                                    | URB |
| 12 | 23.552  | 58.281   | 2.82 | 1154.4 | Muscat, Oman                                                       | URB |
| 10 | 14.688  | 78.481   | 3.20 | 1151.0 | Zuari Cement Rayalaseema & Zuari Thermal Plant, India              | CEM |
| 16 | 45.500  | -73.609  | 2.74 | 1143.7 | Montreal, Canada                                                   | URB |
| 15 | 42.348  | 69.635   | 2.77 | 1143.5 | Chimkent, Kazakhstan                                               | URB |
| 10 | 27.769  | 111.950  | 3.47 | 1141.6 | Loudi, China                                                       | URB |
| 15 | 36.556  | 52.719   | 2.55 | 1140.7 | Babol, Iran                                                        | URB |
| 11 | 37.469  | 129.128  | 3.50 | 1135.7 | Ssangyong C&E Cement Donghae & Eastern Metal Donghae, South Korea  | CEM |
| 19 | 55.308  | 38.488   | 2.77 | 1113.3 | Unidentified, Russia                                               | UNK |
| 12 | 40.188  | 44.542   | 3.26 | 1112.8 | Yerevan, Armenia                                                   | URB |
| 18 | 53.792  | -112.920 | 2.78 | 1098.7 | Edmonton & Nutrien Redwater Fertilizer, Canada                     | OTH |
| 13 | 36.156  | 117.704  | 2.81 | 1095.6 | Gangsheng & Laiwu, China                                           | URB |
| 10 | -2.156  | -79.894  | 2.94 | 1092.2 | Guayaquil, Equator                                                 | URB |
| 13 | -33.892 | 151.103  | 2.71 | 1089.7 | Sydney, Australia                                                  | URB |
| 11 | -6.446  | 110.764  | 2.67 | 1084.7 | PLTU Tanjungjati, Indonesia                                        | TPP |
| 15 | 33.910  | 116.798  | 2.33 | 1080.0 | Huaibei, China                                                     | URB |
| 11 | 38.486  | 27.162   | 3.31 | 1061.3 | Izmir, Türkiye                                                     | URB |
| 15 | 41.065  | 121.256  | 2.51 | 1057.8 | Jinzhou, China                                                     | URB |
| 14 | 40.433  | 71.746   | 2.66 | 1053.8 | Marguilan & Ferghana, Uzbekistan                                   | URB |
| 12 | 40.141  | 65.302   | 3.08 | 1052.1 | Navoi & mining sites, Uzbekistan                                   | MIN |
| 14 | 42.853  | -82.411  | 2.72 | 1039.5 | Point Edward, Canada & Port Huron, United States                   | URB |
| 10 | 33.063  | -8.656   | 3.33 | 1038.3 | Chemical and coal complex, Morocco                                 | OTH |
| 10 | 10.463  | -61.519  | 2.82 | 1032.0 | Chaguanas, Trinidad and Tobago                                     | URB |
| 14 | 30.763  | 30.830   | 2.30 | 1031.4 | Unidentified, Egypt                                                | UNK |
| 10 | -7.719  | 113.563  | 2.79 | 1029.6 | PLTU Paiton, Indonesia                                             | TPP |
| 11 | 36.736  | 36.168   | 3.14 | 1028.1 | Industrial zone (unknown name), Türkiye                            | IND |
| 10 | 24.450  | 39.613   | 3.01 | 1020.7 | Medina, Saudi Arabia                                               | URB |
| 10 | 38.369  | 36.981   | 3.46 | 1009.7 | Afşin Elbistan Termik Santrali & mining sites, Türkiye             | TPP |
| 15 | 53.535  | 9.965    | 3.04 | 1007.2 | Hamburg, Germany                                                   | URB |
| 12 | 36.844  | 53.234   | 2.75 | 984.0  | Neka power plant, Iran                                             | TPP |
| 10 | 32.456  | 34.938   | 3.12 | 977.8  | Orot Rabin Power Plant, Israel                                     | TPP |
| 14 | 38.406  | 106.308  | 2.39 | 976.9  | Yinchuan, China                                                    | URB |
| 12 | 31.594  | 117.958  | 2.56 | 972.4  | Woniu, China                                                       | URB |
| 11 | 30.634  | 122.094  | 2.72 | 958.1  | Xiaoyang island port, China                                        | POR |
| 12 | 33.906  | 112.932  | 2.59 | 958.1  | Shilong industrial zone, China                                     | IND |
| 13 | 37.642  | 120.373  | 2.47 | 947.0  | Longkou, China                                                     | URB |
| 15 | 49.244  | -122.965 | 2.59 | 943.9  | Vancouver, Canada                                                  | URB |
| 12 | 38.745  | 26.896   | 2.64 | 920.6  | Çakmaklı & Izmir, Türkiye                                          | URB |
| 12 | 45.083  | 39.052   | 2.89 | 911.8  | Krasnodar, Russia                                                  | URB |
| 11 | 36.895  | 34.787   | 2.78 | 909.7  | Mersin & Tarse, Türkiye                                            | URB |
| 10 | -22.294 | -68.888  | 2.64 | 908.7  | Chuquicamata mining sites, Chile                                   | MIN |
| 16 | 53.387  | -2.855   | 2.56 | 907.5  | Liverpool, United Kingdom                                          | URB |
| 14 | 54.388  | 86.326   | 2.99 | 906.8  | Bachatsky mining sites, Russia                                     | MIN |
| 11 | 33.565  | 119.060  | 2.66 | 906.3  | Huai'an, China                                                     | URB |
| 12 | 35.052  | 117.172  | 2.48 | 906.0  | Tengzhou, China                                                    | URB |
| 10 | 22.825  | 70.894   | 2.64 | 905.5  | Lakhdirpur industrial zone, India                                  | IND |
| 10 | 27.988  | 78.138   | 2.71 | 891.4  | Power mech project & UltraTech Limited Aligarh Cement Works, India | TPP |
| 12 | 53.250  | 77.573   | 3.33 | 888.8  | Unidentified, Russia                                               | UNK |



|    |         |          |      |       |                                                                  |     |
|----|---------|----------|------|-------|------------------------------------------------------------------|-----|
| 11 | 33.895  | 118.287  | 2.61 | 888.1 | Suqian, China                                                    | URB |
| 11 | 35.412  | 44.310   | 2.66 | 885.7 | Kirkouk, Iraq                                                    | URB |
| 14 | 38.906  | 112.701  | 2.17 | 878.1 | Power plant (unknown name), China                                | TPP |
| 13 | 40.599  | 114.877  | 2.36 | 867.1 | Xian de Xuanhua industrial zone, China                           | IND |
| 10 | 47.888  | 106.838  | 3.45 | 861.6 | Oulan-Bator, Mongolia                                            | URB |
| 12 | 51.193  | 71.563   | 3.08 | 861.2 | Astana & AO Astana Tets-2, Kazakhstan                            | TPP |
| 10 | 35.375  | 47.031   | 2.83 | 859.1 | Sanandaj & Qolyan Iran Power Plant, Iran                         | TPP |
| 10 | 30.356  | 30.556   | 2.67 | 858.5 | Steel area (unknown name), Egypt                                 | STI |
| 10 | -23.925 | -46.363  | 2.52 | 858.1 | Cubatão industrial zone & Santos, Brazil                         | IND |
| 12 | 37.391  | 118.510  | 2.40 | 851.1 | Dongying, China                                                  | URB |
| 10 | 34.631  | 119.481  | 2.75 | 843.2 | Lianyun industrial zone, China                                   | IND |
| 11 | 35.276  | 115.571  | 2.52 | 841.6 | Heze, China                                                      | URB |
| 12 | 40.901  | 69.625   | 2.48 | 837.1 | Ohangaran & Almalyk mining and metallurgical combine, Uzbekistan | MIN |
| 12 | 35.495  | 116.005  | 2.29 | 833.7 | Unidentified, China                                              | UNK |
| 12 | 34.844  | 117.552  | 2.27 | 833.3 | Shizhong, China                                                  | URB |
| 11 | 30.452  | 76.634   | 2.35 | 830.0 | Rajpura & Ambala, India                                          | URB |
| 11 | 38.770  | -9.253   | 2.60 | 828.0 | Lisbon, Portugal                                                 | URB |
| 15 | 54.056  | 86.590   | 2.50 | 817.1 | Krasnobrodsky to Kisseliovsk mining sites, Russia                | MIN |
| 11 | 33.753  | 113.401  | 2.38 | 810.5 | Weidong, China                                                   | URB |
| 11 | 40.253  | 29.003   | 2.57 | 803.0 | Bursa, Türkiye                                                   | URB |
| 12 | 54.135  | 37.568   | 3.06 | 800.0 | Tula industrial zone, Russia                                     | IND |
| 13 | 55.656  | 51.930   | 2.88 | 784.5 | Nijnekamsk industrial zone, Russia                               | IND |
| 12 | 53.276  | 50.313   | 2.92 | 778.7 | Samara, Russia                                                   | URB |
| 13 | 51.373  | 3.291    | 2.54 | 767.4 | Anvers port, Belgium                                             | POR |
| 11 | 40.281  | 68.969   | 2.42 | 756.3 | Syrdarinskaya & Bekobodtsement AJ, Uzbekistan                    | TPP |
| 10 | 51.269  | 37.750   | 3.18 | 739.4 | Mining sites (unknown name), Russia                              | MIN |
| 11 | 53.372  | 83.673   | 2.95 | 719.2 | Barnaoul, Russia                                                 | URB |
| 10 | 52.488  | 103.938  | 3.17 | 717.4 | Angarsk industrial zone, Russia                                  | IND |
| 10 | 37.219  | 37.250   | 2.39 | 708.5 | Gaziantep, Türkiye                                               | URB |
| 11 | 53.810  | 27.457   | 2.91 | 703.2 | Minsk, Belarus                                                   | URB |
| 12 | 53.443  | -2.229   | 2.64 | 702.5 | Manchester, United Kingdom                                       | URB |
| 11 | 43.957  | 126.497  | 2.32 | 682.3 | Changyi & Longtan, China                                         | URB |
| 10 | 38.500  | 112.938  | 2.34 | 681.5 | Xian de Dingxiang, China                                         | URB |
| 11 | 53.514  | -113.474 | 2.75 | 668.8 | Edmonton, Canada                                                 | URB |
| 11 | 45.480  | 10.264   | 2.29 | 657.3 | Brescia, Italy                                                   | URB |
| 10 | 55.175  | 38.081   | 3.03 | 644.5 | Unidentified, Russia                                             | UNK |
| 10 | 61.294  | 73.500   | 3.61 | 644.3 | Surgut, Russia                                                   | URB |
| 11 | 52.486  | -1.923   | 2.55 | 635.3 | Birmingham, United Kingdom                                       | URB |
| 10 | 52.206  | 21.000   | 2.73 | 622.3 | Warsaw, Poland                                                   | URB |
| 10 | 56.000  | 93.000   | 2.98 | 618.9 | Krasnoïarsk, Russia                                              | URB |
| 10 | 53.744  | -1.600   | 2.40 | 527.8 | Leeds, United Kingdom                                            | URB |

Table S1: List of diffuse sources with number of pixels within the corresponding cluster, mean latitude and longitude, mean emission density within cluster and total daily NO<sub>x</sub> emissions using the flux-divergence method. The corresponding emitter is identified, as well the sector probably accounting for the majority of the emissions within the emitter (nine categories are considered: urban (URB), mining (MIN), iron and steel (STI), cement (CEM), power generation (TPP), port (POR), mixed (IND), other (OTH) and unknown sector (UNK)).

| Latitude (°N) | Longitude (°E) | R <sup>2</sup> | Total cluster emissions (kg.h <sup>-1</sup> ) | Total emissions – Gaussian fit (kg.h <sup>-1</sup> ) | Cluster size | Country       | Name of most possible emitters                        | Main sector |
|---------------|----------------|----------------|-----------------------------------------------|------------------------------------------------------|--------------|---------------|-------------------------------------------------------|-------------|
| 31.9688       | 11.1406        | 0.946          | 1193                                          | 867                                                  | 8            | Libya         | Hawamid Gas Power Plant                               | TPP         |
| 31.7063       | 6.0563         | 0.930          | 864                                           | 369                                                  | 5            | Algeria       | Hassi Messaoud Oil field                              | OTH         |
| 27.1875       | 60.5000        | 0.927          | 1072                                          | 455                                                  | 4            | Iran          | Iranshahr                                             | TPP         |
| 29.1641       | 74.0234        | 0.906          | 1107                                          | 974                                                  | 8            | India         | Suratgarh Super Critical Unit-7&8                     | TPP         |
| 23.2917       | 81.0417        | 0.903          | 1021                                          | 631                                                  | 6            | India         | Sanjay Gandhi                                         | TPP         |
| 24.7109       | 84.1016        | 0.901          | 1388                                          | 819                                                  | 8            | India         | Nabi Nagar                                            | TPP         |
| 26.5729       | 12.6771        | 0.899          | 583                                           | 271                                                  | 3            | Libya         | Ubari                                                 | TPP         |
| 32.3438       | 15.1094        | 0.896          | 1198                                          | 703                                                  | 8            | Libya         | Libyan Iron Steel Company                             | STI         |
| 25.1484       | 75.8359        | 0.894          | 1201                                          | 948                                                  | 8            | India         | Kota Super Thermal Power Station                      | TPP         |
| 28.6771       | -106.0729      | 0.894          | 747                                           | 222                                                  | 3            | Mexico        | Chihuahua                                             | URB         |
| 12.9766       | 77.6016        | 0.893          | 1532                                          | 817                                                  | 8            | India         | Bangalore                                             | URB         |
| 16.5000       | 75.8438        | 0.891          | 972                                           | 640                                                  | 6            | India         | NTPC Kudgi                                            | TPP         |
| 12.8616       | 44.9777        | 0.890          | 1506                                          | 882                                                  | 7            | Yemen         | President PP (Petromasila) & Shaykh Uthman urban area | TPP         |
| 27.4688       | 41.7188        | 0.885          | 1314                                          | 857                                                  | 7            | Saudi Arabia  | GCB Hail PP-2 & Hail urban area                       | TPP         |
| -17.3854      | -151.9896      | 0.883          | 1303                                          | 1290                                                 | 3            | NO COUNTRY    | Outlier - Empty area                                  | OUT         |
| 17.4479       | 78.4479        | 0.883          | 1145                                          | 240                                                  | 3            | India         | Hyperabad                                             | URB         |
| 29.5000       | 60.8125        | 0.878          | 821                                           | 403                                                  | 4            | Iran          | Zahedan power station & Zahedan urban area            | TPP         |
| 15.6063       | 32.5063        | 0.877          | 1240                                          | 475                                                  | 5            | Sudan         | Khartoum                                              | URB         |
| 24.3854       | 109.3785       | 0.866          | 1537                                          | 1017                                                 | 9            | China         | Liuzhu industrial zone                                | IND         |
| 15.3563       | 44.2313        | 0.866          | 1064                                          | 469                                                  | 5            | Yemen         | Sanaa                                                 | URB         |
| 24.3750       | 85.5625        | 0.861          | 759                                           | 409                                                  | 4            | India         | Koderma                                               | TPP         |
| 30.6938       | 33.7938        | 0.860          | 894                                           | 490                                                  | 5            | Egypt         | Al-Aarish & Sinai White Cement                        | CEM         |
| 25.5000       | 78.7500        | 0.858          | 605                                           | 337                                                  | 4            | India         | Parichha                                              | TPP         |
| 44.4330       | 26.1116        | 0.857          | 1299                                          | 548                                                  | 7            | Romania       | Bucarest                                              | URB         |
| 21.0469       | 75.8438        | 0.853          | 785                                           | 382                                                  | 4            | India         | Bhusawal                                              | TPP         |
| 37.9375       | 32.5000        | 0.848          | 895                                           | 367                                                  | 4            | Turkey        | Konya Cement Factory + Konya urban area               | CEM         |
| 26.5547       | 101.7031       | 0.846          | 1571                                          | 712                                                  | 8            | China         | Panzhuhua industrial zone                             | IND         |
| 32.3021       | 70.7604        | 0.846          | 496                                           | 241                                                  | 3            | Pakistan      | Lucky Cement Limited Pezu Plant                       | CEM         |
| 22.0781       | 76.5469        | 0.845          | 824                                           | 345                                                  | 4            | India         | Shree Singaji                                         | TPP         |
| 26.2545       | 74.2009        | 0.842          | 1034                                          | 815                                                  | 7            | India         | Shree Cement Limited                                  | CEM         |
| 6.9479        | 79.8854        | 0.834          | 767                                           | 229                                                  | 3            | Sri Lanka     | Kelanitissa Power Station & Colombo                   | TPP         |
| 43.9688       | 115.9688       | 0.834          | 652                                           | 202                                                  | 3            | China         | Xilinhot mining site                                  | MIN         |
| 25.5781       | -103.4297      | 0.831          | 1612                                          | 740                                                  | 8            | Mexico        | Torréon & Met-Mex Peñoles                             | OTH         |
| 31.1875       | 107.5000       | 0.830          | 788                                           | 354                                                  | 4            | China         | Dazhou                                                | URB         |
| 22.1354       | -100.9271      | 0.826          | 1023                                          | 274                                                  | 3            | Mexico        | San Luis Potosí                                       | URB         |
| 40.1146       | 31.6979        | 0.826          | 750                                           | 221                                                  | 3            | Turkey        | Çayırhan                                              | TPP         |
| 36.1354       | -115.1354      | 0.820          | 1528                                          | 451                                                  | 6            | United States | Las Vegas                                             | URB         |
| 38.6920       | 35.5134        | 0.817          | 1033                                          | 535                                                  | 7            | Turkey        | Kayseri                                               | URB         |
| 39.2188       | -111.0313      | 0.814          | 1250                                          | 629                                                  | 8            | United States | PacifiCorp Hunter                                     | TPP         |
| 41.8750       | 12.4688        | 0.812          | 1200                                          | 366                                                  | 6            | Italy         | Rome                                                  | URB         |
| 25.8984       | 81.3359        | 0.812          | 850                                           | 814                                                  | 8            | India         | Feroze Gandhi Unchahar                                | TPP         |
| 31.2396       | 37.4271        | 0.808          | 640                                           | 233                                                  | 3            | Saudi Arabia  | Al Qurayyat                                           | TPP         |
| 42.8854       | 74.5625        | 0.806          | 1100                                          | 419                                                  | 6            | Kyrgyzstan    | Bichkek                                               | URB         |
| 31.0188       | 46.1938        | 0.794          | 1057                                          | 538                                                  | 5            | Iraq          | Nassiriya                                             | URB         |
| 47.4609       | 19.0859        | 0.790          | 1093                                          | 488                                                  | 8            | Hungary       | Budapest                                              | URB         |
| 21.5491       | 109.5223       | 0.785          | 1103                                          | 740                                                  | 7            | China         | Tieshangang industrial zone                           | IND         |
| 24.6979       | 73.0104        | 0.784          | 816                                           | 212                                                  | 3            | India         | JK Ceemnt Sirohi                                      | CEM         |
| 34.4375       | 60.3438        | 0.783          | 849                                           | 314                                                  | 4            | Iran          | Sangan industrial zone                                | IND         |
| 27.5313       | -99.5313       | 0.780          | 761                                           | 212                                                  | 3            | Mexico        | Laredo                                                | URB         |
| 11.7688       | 77.8188        | 0.778          | 974                                           | 590                                                  | 5            | India         | Mettur 1&2                                            | TPP         |

|          |           |       |      |      |   |                      |                                                          |     |
|----------|-----------|-------|------|------|---|----------------------|----------------------------------------------------------|-----|
| 37.5188  | 61.8188   | 0.775 | 983  | 409  | 5 | Turkmenistan         | Mary-3                                                   | TPP |
| 39.5104  | -112.5729 | 0.773 | 630  | 222  | 3 | United States        | Intermountain Power Service Corporation                  | TPP |
| 53.4618  | 59.1146   | 0.772 | 1114 | 655  | 9 | Russia               | Sinter plant (unknown name)                              | STI |
| 8.7455   | 78.2098   | 0.770 | 1354 | 868  | 7 | India                | Tuticorin                                                | TPP |
| 36.1313  | 1.2688    | 0.763 | 829  | 384  | 5 | Algeria              | Cimenterie Chlef ECDE                                    | CEM |
| 21.3958  | 79.9583   | 0.762 | 970  | 668  | 6 | India                | Adani                                                    | TPP |
| 41.2031  | -95.8906  | 0.762 | 886  | 244  | 4 | United States        | Mid American Energy - Walter Scott Jr. Energy Center     | TPP |
| 19.0859  | -98.1641  | 0.761 | 1423 | 788  | 8 | Mexico               | Central Ciclo Combinado San Lorenzo & Puebla urban area  | TPP |
| -29.8507 | 30.9618   | 0.758 | 1483 | 757  | 9 | South Africa         | Durban                                                   | URB |
| 29.3125  | 75.8750   | 0.758 | 569  | 338  | 4 | India                | Rajiv Gandhi - Residential Colony                        | TPP |
| 24.1063  | 52.6813   | 0.757 | 1274 | 563  | 5 | United Arab Emirates | Al Ruways Industrial City                                | IND |
| 36.5156  | -89.5469  | 0.756 | 693  | 311  | 4 | United States        | New Madrid Steam                                         | TPP |
| -20.2563 | -40.2688  | 0.753 | 926  | 491  | 5 | Brazil               | Harsco Environmental (ArcelorMittal)                     | STI |
| 51.2188  | 58.3438   | 0.750 | 837  | 171  | 3 | Russia               | Novotroitsk industrial zone                              | IND |
| 5.2604   | -3.9896   | 0.747 | 895  | 274  | 3 | Côte d'Ivoire        | Abidjan                                                  | URB |
| 11.3188  | 108.7688  | 0.746 | 932  | 431  | 5 | Vietnam              | Nhà Máy Nhiệt Điện Vĩnh Tân 2                            | TPP |
| 11.0000  | -74.8125  | 0.744 | 620  | 338  | 4 | Colombia             | Baranquilla                                              | URB |
| 39.0938  | -94.5938  | 0.742 | 1096 | 233  | 3 | United States        | Kansas City                                              | URB |
| 59.7083  | -158.3542 | 0.742 | 367  | 294  | 6 | United States        | Outlier - Empty area                                     | OUT |
| -20.1188 | 57.4813   | 0.740 | 1133 | 560  | 5 | Mauritius            | Fort George Thermal Power Station & Port Louis           | TPP |
| 28.5000  | -100.6875 | 0.739 | 985  | 488  | 4 | Mexico               | José López Portillo                                      | TPP |
| 23.8438  | 53.6250   | 0.738 | 667  | 375  | 4 | United Arab Emirates | GASCO Habshan industrial zone                            | IND |
| 27.8125  | 79.9063   | 0.736 | 755  | 582  | 6 | India                | Roza                                                     | TPP |
| 18.5438  | -69.8563  | 0.733 | 1070 | 434  | 5 | Dominican Republic   | Saint Domingue                                           | URB |
| -28.4479 | -49.0104  | 0.733 | 581  | 287  | 3 | Brazil               | Jorge Lacerda                                            | TPP |
| 36.1979  | 37.1354   | 0.730 | 413  | 241  | 3 | Syria                | Alep                                                     | URB |
| 14.7031  | -17.3984  | 0.729 | 1395 | 782  | 8 | Senegal              | Dakar                                                    | URB |
| 19.3368  | 105.8021  | 0.727 | 1616 | 1089 | 9 | Vietnam              | Nhà Máy Xi Măng Nghi Sơn                                 | TPP |
| 56.8125  | 60.5938   | 0.720 | 1187 | 426  | 8 | Russia               | Iekaterinbourg                                           | URB |
| -32.8854 | -68.8229  | 0.719 | 1050 | 215  | 3 | Argentina            | Mendoza                                                  | URB |
| 38.1771  | -85.7604  | 0.719 | 973  | 191  | 3 | United States        | Louisville                                               | URB |
| 22.3750  | 73.1250   | 0.716 | 829  | 679  | 6 | India                | Petro Chemical Complex INA                               | IND |
| 24.7500  | 89.3750   | 0.715 | 692  | 360  | 4 | Bangladesh           | Outlier - Inconsistent emissions                         | OUT |
| 22.8750  | 73.3750   | 0.711 | 1243 | 1023 | 8 | India                | Wanakbori                                                | TPP |
| 39.6938  | 66.9188   | 0.711 | 1146 | 348  | 5 | Uzbekistan           | Samarcande                                               | URB |
| 39.8854  | 48.9479   | 0.710 | 476  | 223  | 3 | Azerbaijan           | Cənub Elektrik Stansiyası                                | TPP |
| 28.4598  | 76.3884   | 0.709 | 745  | 702  | 7 | India                | Jhajjar                                                  | TPP |
| 53.7438  | 91.3563   | 0.705 | 1104 | 267  | 5 | Russia               | Abakanskiy Filial Sibirskeya Generiruyushchaya Kompaniya | TPP |
| 33.4271  | 52.5521   | 0.703 | 924  | 282  | 3 | Iran                 | Zaverh Admin bulding PP                                  | TPP |
| 26.5759  | 82.6205   | 0.696 | 786  | 694  | 7 | India                | L&T Power Batching Plant                                 | TPP |
| 6.4688   | 3.4063    | 0.694 | 1653 | 743  | 7 | Nigeria              | Lagos                                                    | URB |
| 53.2188  | 45.0000   | 0.693 | 696  | 232  | 4 | Russia               | Penza                                                    | URB |
| 42.1563  | 25.9688   | 0.691 | 1020 | 196  | 3 | Bulgaria             | Central Contour Global Maritsa East 3                    | TPP |
| 18.0469  | 106.4531  | 0.691 | 722  | 385  | 4 | Vietnam              | Xưởng Luyện Cốt                                          | TPP |
| -23.1813 | -70.3938  | 0.689 | 941  | 621  | 5 | Chile                | Thermal Complex Mejillones Engie                         | TPP |
| 35.7604  | 43.2708   | 0.688 | 677  | 512  | 6 | Iraq                 | Qayyarah Power station                                   | TPP |
| 41.1875  | -8.6250   | 0.687 | 847  | 263  | 4 | Portugal             | Porto                                                    | URB |
| 42.2500  | 26.1250   | 0.685 | 1034 | 288  | 4 | Bulgaria             | TPP Marista East 2                                       | TPP |
| 24.6188  | 77.0438   | 0.684 | 962  | 529  | 5 | India                | Chhabra                                                  | TPP |
| 40.9063  | 117.7188  | 0.684 | 942  | 366  | 5 | China                | Chengde industrial zone                                  | IND |
| 16.8993  | 42.6354   | 0.683 | 1310 | 1129 | 9 | Saudi Arabia         | Jizan                                                    | URB |
| 4.1354   | 100.6354  | 0.683 | 739  | 302  | 3 | Malaysia             | Manjung                                                  | TPP |

|          |           |       |      |      |   |               |                                                   |     |
|----------|-----------|-------|------|------|---|---------------|---------------------------------------------------|-----|
| -23.8125 | 151.2188  | 0.682 | 1148 | 560  | 6 | Australia     | RG Tanna Coal Terminal                            | OTH |
| 24.1771  | -110.3021 | 0.678 | 524  | 240  | 3 | Mexico        | La Paz                                            | URB |
| 51.8188  | 55.1438   | 0.675 | 1134 | 288  | 5 | Russia        | Orenburg                                          | URB |
| 53.3646  | -114.3229 | 0.674 | 605  | 157  | 3 | Canada        | Capital Power - Genesee                           | TPP |
| 10.6146  | -66.9479  | 0.672 | 1195 | 577  | 6 | Venezuela     | Caracas                                           | URB |
| 39.1830  | 27.5759   | 0.672 | 942  | 608  | 7 | Turkey        | Soma                                              | TPP |
| 39.7438  | -86.2063  | 0.670 | 1055 | 326  | 5 | United States | Indianapolis                                      | URB |
| 49.5000  | 8.4688    | 0.669 | 915  | 409  | 6 | Germany       | Manheim                                           | URB |
| 39.4531  | -0.3906   | 0.668 | 1107 | 309  | 4 | Spain         | Valencia                                          | URB |
| 21.6406  | 108.3984  | 0.667 | 1594 | 1001 | 8 | China         | Fangchenggang Port                                | OTH |
| 16.5938  | 80.5491   | 0.664 | 947  | 781  | 7 | India         | Vijayawada                                        | TPP |
| 45.5625  | -122.6250 | 0.663 | 1108 | 345  | 6 | United States | Portland                                          | URB |
| 42.3507  | -71.0729  | 0.663 | 977  | 640  | 9 | United States | Boston                                            | URB |
| 36.3333  | 6.5833    | 0.663 | 839  | 430  | 6 | Algeria       | Constantine                                       | URB |
| -24.2656 | -69.0938  | 0.661 | 1306 | 384  | 4 | Chile         | Estación Zaldivar mining site                     | MIN |
| 33.6250  | -84.4375  | 0.659 | 1047 | 293  | 4 | United States | Atlanta                                           | URB |
| 24.9479  | 34.6771   | 0.659 | 468  | 270  | 3 | Egypt         | Sukari Gold mining site                           | MIN |
| -2.7938  | 122.1813  | 0.658 | 1047 | 559  | 5 | Indonesia     | Dexin Steel Indonesia                             | STI |
| 53.3438  | -6.3125   | 0.658 | 907  | 319  | 6 | Ireland       | Dublin                                            | URB |
| 30.1979  | -93.3229  | 0.658 | 608  | 294  | 3 | United States | Prien Lake industrial zone                        | IND |
| 22.1875  | 84.8438   | 0.657 | 906  | 601  | 6 | India         | Rourkela Steel Plant Area                         | STI |
| 30.4509  | 70.9777   | 0.657 | 572  | 586  | 7 | Pakistan      | Kot Adu                                           | URB |
| 35.0104  | 26.1146   | 0.655 | 667  | 217  | 3 | Greece        | D. R. H. Atherinolakkos                           | TPP |
| 36.8854  | 7.6771    | 0.655 | 501  | 220  | 3 | Algeria       | El-Hadjar Steel Complex                           | STI |
| 12.7049  | 101.1771  | 0.650 | 1384 | 1059 | 9 | Thailand      | Maptaphut industrial zone                         | IND |
| 21.2031  | 73.5469   | 0.650 | 894  | 411  | 4 | India         | Ukai                                              | TPP |
| 24.2500  | 113.4063  | 0.648 | 763  | 585  | 6 | China         | Yingde industrial zone                            | IND |
| 41.8229  | 81.8021   | 0.648 | 701  | 194  | 3 | China         | Industrial facility (unknown name)                | OTH |
| 27.1250  | 78.3750   | 0.647 | 480  | 356  | 4 | India         | Firozabad                                         | URB |
| 45.1016  | 7.7344    | 0.644 | 1243 | 557  | 8 | Italy         | Turin                                             | URB |
| 37.0625  | 27.8750   | 0.641 | 697  | 303  | 4 | Turkey        | Teknokon Industry Kemerköy                        | TPP |
| 50.0313  | 19.9688   | 0.637 | 804  | 164  | 3 | Poland        | Cracovie                                          | URB |
| 50.4219  | 30.5469   | 0.633 | 1157 | 249  | 4 | Ukraine       | Kiev                                              | URB |
| 23.3646  | 111.0104  | 0.631 | 673  | 264  | 3 | China         | Guangxi Hongjun Ceramics                          | OTH |
| 55.3750  | 86.0625   | 0.629 | 927  | 583  | 8 | Russia        | Kemerovskaya GRES                                 | TPP |
| 57.1146  | 65.6250   | 0.627 | 790  | 348  | 6 | Russia        | Tuymen urban and industrial zone                  | IND |
| 10.8281  | 106.6563  | 0.622 | 1126 | 322  | 4 | Vietnam       | Ho Chi Minh Ville                                 | URB |
| 52.1146  | 47.4271   | 0.622 | 440  | 225  | 3 | Russia        | Heidelberg Cement Volga                           | CEM |
| 24.2604  | 37.5521   | 0.620 | 516  | 242  | 3 | Saudi Arabia  | Yanbu Cement Company                              | CEM |
| 48.4313  | 135.1063  | 0.612 | 1209 | 291  | 5 | Russia        | Khabarovsk & Khabarovskaya Tets-1                 | URB |
| -17.2500 | -70.5938  | 0.610 | 1422 | 543  | 6 | Peru          | Toquepala mining site                             | MIN |
| 56.2455  | 90.4509   | 0.610 | 779  | 464  | 7 | Russia        | Achinskii Tsement & Achinsk Alumina Refinery      | CEM |
| 22.8281  | 108.3281  | 0.609 | 1197 | 699  | 8 | China         | Nanning                                           | URB |
| 45.4479  | 12.2500   | 0.608 | 817  | 420  | 6 | Italy         | Edison Marghera Levante CCGT Power Plant          | TPP |
| 43.3438  | 45.7500   | 0.606 | 1082 | 251  | 4 | Russia        | Power station (unknown name) & Groznyí urban area | TPP |
| 41.5000  | 31.9063   | 0.603 | 965  | 519  | 8 | Turkey        | Catalagzi                                         | TPP |
| 23.7188  | 86.1146   | 0.602 | 1112 | 1068 | 9 | India         | Chandrapura                                       | TPP |
| 59.8750  | 29.9688   | 0.600 | 2968 | 190  | 4 | Russia        | Outlier - Inconsistent emissions                  | OUT |
| 15.6063  | -88.0063  | 0.600 | 634  | 499  | 5 | Honduras      | San Pedro Sula                                    | URB |
| 31.5313  | 83.0313   | 0.594 | 800  | 237  | 3 | China         | Outlier - Empty area                              | OUT |
| 20.9479  | 86.0729   | 0.594 | 670  | 314  | 3 | India         | MBF Plant (Visa Special Steel Unlimited)          | STI |
| 23.1313  | -82.3938  | 0.590 | 823  | 518  | 5 | Cuba          | La Havane                                         | URB |

|          |           |       |      |     |   |               |                                                        |     |
|----------|-----------|-------|------|-----|---|---------------|--------------------------------------------------------|-----|
| 21.7396  | 108.6146  | 0.589 | 1646 | 253 | 3 | China         | Qinzhou Port                                           | OTH |
| 32.0781  | 112.2031  | 0.588 | 930  | 294 | 4 | China         | Xiangyang                                              | URB |
| -22.8854 | -69.3229  | 0.587 | 1288 | 283 | 3 | Chile         | Sierra Gorda mining site & Planta Molibdeno            | MIN |
| 43.6920  | 95.0134   | 0.587 | 911  | 639 | 7 | China         | Power station (unknown name)                           | TPP |
| 51.2813  | 19.3438   | 0.580 | 821  | 714 | 9 | Poland        | Bełchatów                                              | TPP |
| 37.8203  | -122.3281 | 0.577 | 1211 | 596 | 8 | United States | San Francisco/Oakland                                  | URB |
| 35.3750  | -119.0625 | 0.568 | 1003 | 268 | 4 | United States | Bakersfield                                            | URB |
| 51.3021  | 19.5521   | 0.568 | 828  | 151 | 3 | Poland        | Outlier - Inconsistent emissions                       | OUT |
| 55.5938  | 65.1250   | 0.568 | 359  | 318 | 4 | Russia        | Outlier - Empty area                                   | OUT |
| 31.8563  | 47.1313   | 0.565 | 876  | 444 | 5 | Iraq          | Maysan power station & Al-Amara urban area             | TPP |
| 28.6875  | 53.5625   | 0.565 | 841  | 331 | 4 | Iran          | Jahrom                                                 | TPP |
| 48.1719  | 16.4063   | 0.562 | 697  | 221 | 4 | Austria       | Vienna                                                 | URB |
| 37.0188  | 128.3188  | 0.557 | 1555 | 592 | 5 | South Korea   | Sungshin Yanghoe Danyang Factories                     | CEM |
| 31.6641  | 73.2109   | 0.557 | 1124 | 648 | 8 | Pakistan      | PACHEM Global Pvt. Ltd                                 | STI |
| 31.4509  | 73.0938   | 0.556 | 1206 | 555 | 7 | Pakistan      | Faisalabad                                             | URB |
| 35.5670  | 45.3884   | 0.555 | 1281 | 701 | 7 | Iraq          | Sulaymaniyah                                           | URB |
| -38.2455 | 146.6027  | 0.555 | 1083 | 637 | 7 | Australia     | Loy Yang A & B                                         | TPP |
| 54.7188  | 20.5000   | 0.555 | 778  | 197 | 4 | Russia        | Kaliningrad                                            | URB |
| -33.1250 | 151.5859  | 0.550 | 1299 | 704 | 8 | Australia     | Vales Point                                            | TPP |
| 17.6667  | 42.1667   | 0.543 | 950  | 641 | 6 | Saudi Arabia  | Shuqaiq Steam Power Plant                              | TPP |
| 34.0625  | 131.8125  | 0.537 | 604  | 321 | 4 | Japan         | Tokuyama Higashi                                       | TPP |
| 43.4375  | 4.8750    | 0.536 | 522  | 251 | 4 | France        | ArcelorMittal PCD4 FOS SUR MER                         | STI |
| 44.7563  | 37.7688   | 0.535 | 1296 | 366 | 5 | Russia        | Novorossiisk                                           | URB |
| 54.7396  | 56.0104   | 0.535 | 1179 | 146 | 3 | Russia        | Truba                                                  | TPP |
| 50.0938  | 8.6076    | 0.535 | 987  | 570 | 9 | Germany       | Frankfurt                                              | URB |
| 57.9330  | 56.2009   | 0.530 | 691  | 334 | 7 | Russia        | CHPP 9                                                 | TPP |
| 24.8854  | 89.9896   | 0.530 | 487  | 247 | 3 | Bangladesh    | United Jamalpur                                        | TPP |
| 35.1875  | 126.8125  | 0.528 | 970  | 294 | 4 | South Korea   | Gwangju                                                | URB |
| 30.8750  | 75.8750   | 0.526 | 520  | 345 | 4 | India         | Ludhiana                                               | URB |
| 36.9955  | 35.3616   | 0.524 | 764  | 492 | 7 | Turkey        | Adana                                                  | URB |
| 52.5000  | 13.3750   | 0.523 | 1227 | 233 | 4 | Germany       | Berlin                                                 | URB |
| 17.1313  | 77.2063   | 0.523 | 860  | 402 | 5 | India         | Thermal Power Plant Unit 4 Ultratech Cement            | CEM |
| 40.5563  | 70.9563   | 0.523 | 823  | 313 | 5 | Uzbekistan    | Kokand Thermal Power Station & Kokand                  | TPP |
| 25.1641  | 81.6641   | 0.518 | 849  | 786 | 8 | India         | Bara Thermal Power Station + Ultratech grinding unit   | TPP |
| 38.6250  | -90.1875  | 0.512 | 954  | 263 | 4 | United States | Saint Louis                                            | URB |
| 29.9375  | -90.1250  | 0.507 | 866  | 285 | 4 | United States | New Orleans                                            | URB |
| 42.2500  | 119.0313  | 0.497 | 784  | 269 | 4 | China         | Honghan industrial zone                                | IND |
| 54.3688  | 18.6688   | 0.497 | 701  | 271 | 5 | Poland        | Wybrzeze (Gdansk/Gdynia) CHP Power Plant & Gdansk port | TPP |
| 57.4340  | 41.2118   | 0.494 | 840  | 656 | 9 | Russia        | Kostroma                                               | TPP |
| -6.8021  | 111.9271  | 0.493 | 770  | 246 | 3 | Indonesia     | Indonesia Semen Tuban                                  | CEM |
| 26.6146  | 106.6771  | 0.492 | 1040 | 208 | 3 | China         | Guiyang industrial zone                                | IND |
| 33.2708  | 131.6458  | 0.492 | 710  | 677 | 6 | Japan         | Nippon Steel Corporation Oita Works                    | STI |
| -22.8594 | -47.1406  | 0.491 | 752  | 284 | 4 | Brazil        | Campinas                                               | URB |
| 50.0313  | 8.3125    | 0.490 | 912  | 210 | 4 | Germany       | Mainz                                                  | URB |
| 24.1354  | 81.9271   | 0.490 | 742  | 289 | 3 | India         | Jaypee Nigrie                                          | TPP |
| 17.6146  | 80.6979   | 0.489 | 498  | 260 | 3 | India         | Kothagudem Thermal Power Station VII stage             | TPP |
| 21.0729  | 110.4896  | 0.488 | 473  | 272 | 3 | China         | Industrial zone (unknown name)                         | IND |
| 30.4896  | -91.1979  | 0.484 | 713  | 216 | 3 | United States | Bâton Rouge                                            | URB |
| 34.7734  | 48.5391   | 0.480 | 1037 | 779 | 8 | Iran          | Hamadan                                                | URB |
| 31.4063  | 31.7031   | 0.480 | 1002 | 842 | 8 | Egypt         | Damietta                                               | URB |
| 53.7902  | 74.0670   | 0.473 | 856  | 455 | 7 | Russia        | Outlier - Empty area                                   | OUT |
| 32.0625  | 74.8125   | 0.473 | 427  | 296 | 4 | Pakistan      | Hubco Narowal                                          | TPP |

|         |          |       |      |     |   |                |                                                           |     |
|---------|----------|-------|------|-----|---|----------------|-----------------------------------------------------------|-----|
| 51.4375 | 14.5938  | 0.472 | 446  | 424 | 6 | Germany        | Boxberg                                                   | TPP |
| 44.8063 | 20.4563  | 0.470 | 967  | 314 | 5 | Serbia         | Belgrade                                                  | URB |
| 31.8125 | 34.6875  | 0.469 | 1522 | 274 | 4 | Israel         | Eshkol                                                    | TPP |
| 27.8203 | 114.9063 | 0.468 | 1071 | 907 | 8 | China          | Xinyu urban area and industrial zone                      | IND |
| 39.0000 | 125.7188 | 0.466 | 713  | 564 | 6 | North Korea    | Pyongyang                                                 | TPP |
| 26.7991 | 119.7902 | 0.465 | 901  | 857 | 7 | China          | Power station (unknown name)                              | TPP |
| 51.1979 | 12.3646  | 0.465 | 352  | 163 | 3 | Germany        | Lippendorf                                                | TPP |
| 36.9598 | 54.8259  | 0.462 | 1075 | 593 | 7 | Iran           | Ali Abad Gas Turbine Power Plant                          | TPP |
| 53.6116 | -0.1830  | 0.460 | 836  | 409 | 7 | United Kingdom | VPI Immingham Power Station                               | TPP |
| 43.3125 | 5.3750   | 0.459 | 469  | 267 | 4 | France         | Marseille                                                 | URB |
| 32.8750 | 115.8125 | 0.458 | 730  | 290 | 4 | China          | Fuyang                                                    | URB |
| 48.4271 | 35.0521  | 0.456 | 581  | 180 | 3 | Ukraine        | Dnipro                                                    | URB |
| 31.6875 | 47.2500  | 0.455 | 902  | 282 | 4 | Iraq           | Al-Amarah                                                 | TPP |
| 25.1188 | 81.9188  | 0.450 | 1186 | 458 | 5 | India          | TPSC NPTC                                                 | TPP |
| 30.3313 | 111.5688 | 0.450 | 1144 | 352 | 5 | China          | Outlier - Inconsistent emissions                          | OUT |
| 37.6094 | 105.2891 | 0.445 | 1208 | 596 | 8 | China          | Ningxia Iron and Steel Group No.3 Men                     | STI |
| 40.7396 | 72.3021  | 0.445 | 999  | 642 | 9 | Uzbekistan     | Reco Sement Zavodi                                        | CEM |
| 57.6063 | 39.8688  | 0.445 | 688  | 358 | 5 | Russia         | Yaroslavl CHP-2                                           | TPP |
| 40.5729 | 49.6146  | 0.442 | 2224 | 231 | 3 | Azerbaijan     | Sumgait                                                   | URB |
| 29.9063 | 75.2500  | 0.442 | 531  | 523 | 6 | India          | Talwandi Sabo (Super Critical)                            | TPP |
| 51.0223 | 2.2902   | 0.438 | 570  | 461 | 7 | France         | AcelorMittal Dunkerque                                    | STI |
| 44.6771 | 20.1771  | 0.434 | 1043 | 224 | 3 | Serbia         | Nikola Tesla                                              | TPP |
| 55.8063 | 49.1688  | 0.430 | 1259 | 312 | 5 | Russia         | Kazan 3                                                   | TPP |
| 41.0547 | 71.5547  | 0.429 | 733  | 514 | 8 | Uzbekistan     | Namangan                                                  | URB |
| 41.4479 | -81.6771 | 0.421 | 572  | 194 | 3 | United States  | Cleveland                                                 | URB |
| 53.5688 | 49.8938  | 0.417 | 1105 | 278 | 5 | Russia         | Outlier - Empty area                                      | OUT |
| 24.2938 | 121.7063 | 0.417 | 744  | 469 | 5 | Taiwan         | Hoping power station & Taiwan Cement Company              | TPP |
| 30.3229 | 112.3125 | 0.415 | 707  | 541 | 6 | China          | Jingzhou                                                  | URB |
| 36.1563 | -5.4063  | 0.405 | 602  | 421 | 5 | Spain          | Campo de Gibraltar CCGT & Algeiras/Gibraltar urban area   | TPP |
| 30.0000 | -90.4375 | 0.404 | 747  | 285 | 4 | United States  | Norco North Entergy Power Station & Dow Chemical Plant    | IND |
| 35.6771 | -0.6215  | 0.400 | 1607 | 791 | 9 | Algeria        | Oran                                                      | URB |
| 50.9063 | -1.3884  | 0.395 | 516  | 373 | 7 | United Kingdom | Southampton                                               | URB |
| 34.3750 | 115.6250 | 0.393 | 555  | 282 | 4 | China          | Shangqiu                                                  | URB |
| 32.7500 | 45.0938  | 0.389 | 996  | 882 | 8 | Iraq           | Wassit                                                    | TPP |
| 33.0000 | 112.5625 | 0.387 | 590  | 295 | 4 | China          | Tongi                                                     | URB |
| 47.2118 | 39.7326  | 0.380 | 909  | 615 | 9 | Russia         | Rostov-on-Don                                             | URB |
| 22.0580 | 88.1116  | 0.377 | 723  | 769 | 7 | India          | Haldia industrial zone                                    | IND |
| 29.8125 | 116.3125 | 0.376 | 879  | 528 | 6 | China          | Industrial zone (unknown name)                            | IND |
| 56.3125 | 44.5313  | 0.371 | 1488 | 365 | 6 | Russia         | Outlier - Empty area                                      | OUT |
| 29.7500 | 104.5000 | 0.370 | 509  | 300 | 4 | China          | Cheng Yu Fan Tai Technology Co.Ltd. Manufacturing Factory | OTH |
| 24.8854 | 102.5000 | 0.369 | 1406 | 556 | 6 | China          | Yunnan industrial zone                                    | IND |
| 42.2396 | -83.3021 | 0.368 | 1579 | 178 | 3 | United States  | Cliffs Steel                                              | STI |
| 42.7500 | 88.6563  | 0.367 | 1108 | 255 | 4 | China          | Xingjiang Sunye Energy Chemical Engineering               | OTH |
| 30.1979 | 71.4896  | 0.367 | 356  | 211 | 3 | Pakistan       | Multan                                                    | URB |
| 37.9063 | 102.6458 | 0.365 | 1016 | 363 | 6 | China          | Wuwei                                                     | URB |
| 29.2266 | 119.5703 | 0.363 | 904  | 692 | 8 | China          | Xishansi mining site                                      | MIN |
| 45.0469 | -83.2656 | 0.357 | 683  | 346 | 4 | United States  | Holcim Alpena Cement Plant                                | CEM |
| 62.7438 | 81.1813  | 0.355 | 886  | 276 | 5 | Russia         | Outlier - Empty area                                      | OUT |
| 30.0813 | 77.3313  | 0.354 | 409  | 395 | 5 | India          | Haryana Yamunanagar                                       | TPP |
| 34.1146 | 112.8229 | 0.353 | 901  | 220 | 3 | China          | Ruzhou industrial zone                                    | IND |
| 25.3785 | 49.5451  | 0.350 | 1248 | 815 | 9 | Saudi Arabia   | Al Hufuf                                                  | URB |
| 36.0104 | 129.3993 | 0.344 | 1126 | 984 | 9 | South Korea    | Pohang Coal Port                                          | IND |

|          |           |       |      |     |   |               |                                                        |     |
|----------|-----------|-------|------|-----|---|---------------|--------------------------------------------------------|-----|
| 62.7396  | 80.8854   | 0.338 | 786  | 121 | 3 | Russia        | Outlier - Empty area                                   | OUT |
| 35.6146  | 44.8854   | 0.337 | 1045 | 254 | 3 | Iraq          | Sulaymanya                                             | TPP |
| 52.0729  | 78.3646   | 0.333 | 237  | 193 | 3 | Kazakhstan    | Outlier - Empty area                                   | OUT |
| 50.5625  | 13.7813   | 0.332 | 731  | 225 | 4 | Czechia       | Ele Chladící Věž                                       | TPP |
| 41.3438  | 122.1563  | 0.331 | 1455 | 187 | 3 | China         | Power station (unknown name)                           | TPP |
| 42.8646  | 87.9479   | 0.331 | 1048 | 217 | 3 | China         | Industrial facility (unknown name)                     | OTH |
| 29.7277  | 116.0491  | 0.327 | 883  | 572 | 7 | China         | Jinjipo industrial zone                                | IND |
| 57.3646  | -111.1354 | 0.323 | 986  | 157 | 3 | Canada        | Kearl mining site                                      | MIN |
| 24.9826  | 102.7674  | 0.320 | 1107 | 765 | 9 | China         | Kunming                                                | URB |
| 47.2813  | 39.2188   | 0.317 | 555  | 231 | 3 | Russia        | Outlier - Inconsistent emissions                       | OUT |
| 52.2634  | 104.1920  | 0.316 | 1233 | 391 | 7 | Russia        | Novo-Irkutskaya Tets                                   | TPP |
| 35.1295  | 48.8884   | 0.313 | 819  | 636 | 7 | Iran          | Mofatteh Power Plant & Vian Steel Complex              | STI |
| 55.5469  | 35.5781   | 0.304 | 1096 | 196 | 4 | Russia        | Outlier - Inconsistent emissions                       | OUT |
| 51.0729  | 1.6771    | 0.300 | 823  | 162 | 3 | France        | Channel (shipping)                                     | OTH |
| 36.7266  | 49.4609   | 0.300 | 706  | 668 | 8 | Iran          | Khazar Cement Factory                                  | CEM |
| 33.3646  | 120.1354  | 0.299 | 682  | 194 | 3 | China         | Yancheng                                               | URB |
| 45.4896  | 126.9896  | 0.298 | 1813 | 180 | 3 | China         | Acheng                                                 | URB |
| -32.8854 | 151.7396  | 0.297 | 1393 | 208 | 3 | Australia     | Newcastle                                              | URB |
| 49.7813  | 18.3438   | 0.297 | 1000 | 167 | 3 | Czechia       | Ostrava industrial zone                                | IND |
| 57.0521  | -111.5833 | 0.297 | 961  | 263 | 6 | Canada        | Syncrude ID station (oilsand)                          | OTH |
| 41.5000  | -83.3438  | 0.296 | 981  | 253 | 4 | United States | Martin Marietta - Lime and Stone                       | CEM |
| 35.7188  | 118.6116  | 0.290 | 1087 | 507 | 7 | China         | Xian de Yishui industrial zone                         | IND |
| 57.0938  | 84.3854   | 0.289 | 466  | 584 | 9 | Russia        | Outlier - Empty area                                   | OUT |
| 36.5156  | 52.3438   | 0.288 | 1026 | 283 | 4 | Iran          | Amol                                                   | URB |
| 39.5729  | 121.2396  | 0.288 | 740  | 187 | 3 | China         | Changxing Island Hengli                                | TPP |
| 31.4896  | 34.4479   | 0.287 | 807  | 208 | 3 | Palestine     | Gaza                                                   | URB |
| 43.1354  | 124.3854  | 0.282 | 789  | 182 | 3 | China         | Siping urban and industrial zone                       | IND |
| 25.6250  | 32.5313   | 0.279 | 518  | 304 | 4 | Egypt         | Impossible to characterize                             | OTH |
| 60.1563  | 30.5938   | 0.278 | 2338 | 473 | 7 | Russia        | Outlier - Inconsistent emissions                       | OUT |
| 34.4766  | 133.4531  | 0.277 | 1469 | 801 | 8 | Japan         | Setouchi Joint - LTD Fukuyama Joint Power              | TPP |
| 43.2708  | 87.5417   | 0.276 | 816  | 360 | 6 | China         | Aketashi mining site                                   | MIN |
| 21.6938  | 72.6063   | 0.276 | 478  | 472 | 5 | India         | Lakhigam industrial zone                               | IND |
| 36.8646  | 54.4271   | 0.273 | 859  | 203 | 3 | Iran          | Gorgan                                                 | URB |
| 45.4896  | -85.6146  | 0.272 | 506  | 261 | 3 | United States | Outlier - Empty area                                   | OUT |
| 43.8854  | 94.6979   | 0.270 | 1137 | 198 | 3 | China         | Yireng Leke mining site                                | MIN |
| 31.0313  | 112.2500  | 0.269 | 611  | 303 | 4 | China         | Jigmen                                                 | URB |
| 40.2366  | 49.5759   | 0.268 | 1668 | 459 | 7 | Azerbaijan    | Holcim Azerbaijan                                      | CEM |
| 34.3906  | 119.7734  | 0.266 | 598  | 708 | 8 | China         | Guanhe river mouth industrial zone                     | IND |
| 41.6563  | -83.4688  | 0.264 | 917  | 199 | 3 | United States | Cleveland-Cliffs HBI                                   | STI |
| 40.8125  | 30.3750   | 0.263 | 806  | 242 | 4 | Türkiye       | Enka Natural Gas Combined Cycle Power Plant            | TPP |
| 25.0000  | 103.1875  | 0.261 | 892  | 316 | 4 | China         | Yiliang Jinzhu Cement                                  | CEM |
| 50.8854  | 6.0104    | 0.260 | 805  | 158 | 3 | Netherlands   | Sibelco Benelux                                        | CEM |
| 59.7813  | 29.3125   | 0.257 | 1048 | 158 | 4 | Russia        | Industrial facility (unknown name)                     | OTH |
| 25.1563  | 121.7813  | 0.253 | 1226 | 239 | 3 | Taiwan        | Concord Power                                          | TPP |
| 31.8125  | 44.1250   | 0.246 | 2225 | 273 | 4 | Iraq          | KAR Cement Plant                                       | CEM |
| 55.6813  | 52.6063   | 0.246 | 660  | 267 | 5 | Russia        | Tem-Po, Naberezhnochelninskiy Zavod Metallokonstruksiy | STI |
| 30.6771  | 76.7396   | 0.244 | 914  | 213 | 3 | India         | Mohali/Panchkula/Chandigarh                            | URB |
| 34.7438  | 112.0813  | 0.243 | 894  | 343 | 5 | China         | Power station (unknown name)                           | TPP |
| 31.3125  | 76.9063   | 0.241 | 625  | 431 | 6 | India         | Ultratech Cement Baga                                  | CEM |
| 51.8281  | 14.4688   | 0.237 | 299  | 247 | 4 | Germany       | Jänschwalde                                            | TPP |
| 56.2031  | 51.3984   | 0.236 | 677  | 486 | 8 | Russia        | Outlier - Inconsistent emissions                       | OUT |
| 40.7813  | 113.2813  | 0.230 | 1217 | 231 | 3 | China         | Power station (unknown name)                           | TPP |

|         |           |       |      |     |   |                      |                                                             |     |
|---------|-----------|-------|------|-----|---|----------------------|-------------------------------------------------------------|-----|
| 30.2500 | 75.1875   | 0.227 | 297  | 322 | 4 | India                | Guru Hargobind                                              | TPP |
| 45.4063 | 10.9688   | 0.225 | 798  | 165 | 3 | Italy                | Verona                                                      | URB |
| 33.0670 | 131.8527  | 0.224 | 820  | 530 | 7 | Japan                | Tsukumi mining site & Tsukumi plant                         | MIN |
| 2.5521  | 101.7396  | 0.224 | 768  | 257 | 3 | Malaysia             | Jimah                                                       | TPP |
| 56.7604 | 36.7396   | 0.221 | 228  | 130 | 3 | Russia               | Konakovovo                                                  | TPP |
| 52.9479 | -1.1979   | 0.220 | 658  | 157 | 3 | United Kingdom       | Nottingham                                                  | URB |
| 60.2688 | 25.5063   | 0.216 | 618  | 268 | 5 | Finland              | Kilpilahti industrial zone                                  | IND |
| 38.8750 | -77.0313  | 0.215 | 769  | 405 | 6 | United States        | Washington DC                                               | URB |
| 47.6979 | 38.2604   | 0.215 | 725  | 169 | 3 | Ukraine              | Outlier - Empty area                                        | OUT |
| 56.8688 | 62.0563   | 0.214 | 2060 | 257 | 5 | Russia               | Slk Tsement                                                 | CEM |
| 25.6667 | 49.4792   | 0.213 | 576  | 686 | 6 | Saudi Arabia         | Saudi Cement Company                                        | CEM |
| 52.8438 | -1.3125   | 0.211 | 600  | 213 | 4 | United Kingdom       | Ratcliffe-on-Soar                                           | TPP |
| 32.6771 | 116.3229  | 0.207 | 278  | 228 | 3 | China                | Outlier - Inconsistent emissions                            | OUT |
| 21.7009 | 73.0491   | 0.206 | 760  | 551 | 7 | India                | Gujarat Narmada Valley Fertilizers & Chemicals Limited      | IND |
| 47.4375 | 40.1563   | 0.198 | 405  | 392 | 6 | Russia               | Rosatov AO Metallotorg                                      | STI |
| 53.7455 | 77.8527   | 0.197 | 963  | 506 | 7 | Russia               | Outlier - Empty area                                        | OUT |
| 25.9757 | 56.0451   | 0.197 | 616  | 927 | 9 | United Arab Emirates | Union Cement Company                                        | CEM |
| 25.2188 | 118.9688  | 0.193 | 765  | 788 | 9 | China                | Meizhou Bay                                                 | OTH |
| 32.6953 | 116.9453  | 0.190 | 580  | 604 | 8 | China                | Power station (unknown name)                                | TPP |
| 41.2063 | -112.0563 | 0.188 | 505  | 332 | 5 | United States        | Outlier - Inconsistent emissions                            | OUT |
| 35.3646 | 118.3021  | 0.186 | 1255 | 186 | 3 | China                | Outlier - Inconsistent emissions                            | OUT |
| 11.3854 | 79.2396   | 0.183 | 1408 | 252 | 3 | India                | The Ramco Cements Ltd., PP                                  | CEM |
| 47.8125 | 38.0000   | 0.183 | 612  | 408 | 6 | Ukraine              | Starobesheve                                                | TPP |
| 53.7188 | -0.9688   | 0.183 | 558  | 170 | 3 | United Kingdom       | Drax                                                        | TPP |
| 26.0243 | 119.4549  | 0.182 | 844  | 727 | 9 | China                | Fuzhou                                                      | URB |
| 55.3958 | 52.1146   | 0.182 | 698  | 362 | 6 | Russia               | Outlier - Empty area                                        | OUT |
| 36.5938 | 53.0313   | 0.179 | 998  | 259 | 3 | Iran                 | Sari                                                        | URB |
| 55.9271 | 51.4479   | 0.178 | 674  | 255 | 3 | Russia               | Outlier - Empty area                                        | OUT |
| 31.0313 | 76.5781   | 0.173 | 383  | 304 | 4 | India                | Guru Gobind Singh                                           | TPP |
| 25.7396 | 119.5174  | 0.167 | 502  | 688 | 9 | China                | Industrial zone (unknown name)                              | IND |
| 55.8229 | 41.7396   | 0.167 | 296  | 143 | 3 | Russia               | Outlier - Inconsistent emissions                            | OUT |
| 13.1094 | 100.9063  | 0.166 | 497  | 385 | 4 | Thailand             | Thung Sukhla industrial zone                                | IND |
| 44.4688 | -81.5000  | 0.165 | 455  | 374 | 4 | Canada               | Outlier - Empty area                                        | OUT |
| 32.7674 | 12.6771   | 0.163 | 938  | 890 | 9 | Libya                | Az Zawiyah Power Plant                                      | TPP |
| 53.9271 | 39.1979   | 0.162 | 528  | 150 | 3 | Russia               | Outlier - Empty area                                        | OUT |
| 54.0469 | 38.1563   | 0.162 | 464  | 219 | 4 | Russia               | Novomoskovskaya Gres                                        | TPP |
| 40.3828 | 113.0078  | 0.159 | 682  | 621 | 8 | China                | Fengzhen, Ulaan Chab industrial zone                        | IND |
| 38.0521 | 118.8854  | 0.158 | 189  | 200 | 3 | China                | Dongying Haikerui Lin & Shandong Deyang Chemical Industries | IND |
| 58.4063 | -60.3594  | 0.156 | 315  | 278 | 4 | NO COUNTRY           | Outlier - Empty area                                        | OUT |
| 53.9271 | 79.5104   | 0.153 | 985  | 191 | 3 | Russia               | Outlier - Empty area                                        | OUT |
| 23.7604 | 86.3854   | 0.151 | 978  | 234 | 3 | India                | Kustore mining site                                         | MIN |
| 39.4271 | 126.0000  | 0.150 | 812  | 509 | 6 | North Korea          | Sunchon Cement Complex & South Pyongan Ore Processing Plant | CEM |
| 48.0625 | 38.2604   | 0.149 | 425  | 419 | 6 | Ukraine              | Zuivska                                                     | TPP |
| 44.1146 | -81.8646  | 0.145 | 313  | 282 | 3 | Canada               | Outlier - Empty area                                        | OUT |
| 52.3958 | 77.5938   | 0.142 | 581  | 614 | 6 | Kazakhstan           | Outlier - Empty area                                        | OUT |
| 56.7604 | 62.6771   | 0.141 | 260  | 126 | 3 | Russia               | Outlier - Inconsistent emissions                            | OUT |
| 41.4583 | -88.1146  | 0.139 | 1035 | 442 | 6 | United States        | Joliet 9                                                    | TPP |
| 18.6813 | 72.9813   | 0.137 | 1380 | 571 | 5 | India                | JSW Cement + JSW Steel                                      | CEM |
| 19.8438 | 105.7813  | 0.136 | 1645 | 237 | 3 | Vietnam              | Than Hoa                                                    | URB |
| 54.2396 | 38.8854   | 0.136 | 256  | 179 | 3 | Russia               | Serebrynskiy Tsementnyy Zavod                               | CEM |
| 34.3563 | 117.9938  | 0.134 | 277  | 360 | 5 | China                | Power station (unknown name)                                | TPP |
| 30.0625 | 103.7813  | 0.133 | 636  | 293 | 4 | China                | Sichuan Guangxin Aluminium Industry                         | OTH |



|          |          |       |      |      |   |                |                                                             |     |
|----------|----------|-------|------|------|---|----------------|-------------------------------------------------------------|-----|
| 55.7188  | 52.4063  | 0.132 | 561  | 172  | 3 | Russia         | Naberezhnochelninskaya Tets & Naberejnye Tchelny urban area | TPP |
| 34.1458  | 118.7917 | 0.130 | 238  | 406  | 6 | China          | Mengxi                                                      | URB |
| 54.4813  | 87.6438  | 0.128 | 474  | 234  | 5 | Russia         | Outlier - Empty area                                        | OUT |
| 38.3938  | 112.6813 | 0.127 | 859  | 330  | 5 | China          | Xinzhou                                                     | URB |
| 35.6250  | 53.4688  | 0.127 | 420  | 280  | 4 | Iran           | Qods                                                        | TPP |
| 34.3563  | 118.3063 | 0.127 | 306  | 351  | 5 | China          | Xinyi                                                       | URB |
| 17.2604  | 42.3854  | 0.126 | 426  | 335  | 3 | Saudi Arabia   | Jazan City for Primary and Downstream Industries            | IND |
| 38.4188  | 114.2063 | 0.123 | 1511 | 368  | 5 | China          | Hebei industrial zone                                       | IND |
| 30.1979  | 112.6354 | 0.123 | 255  | 259  | 3 | China          | Power station (unknown name)                                | TPP |
| 50.6563  | 5.5313   | 0.118 | 305  | 156  | 3 | Belgium        | Liège                                                       | URB |
| 22.8047  | 69.5703  | 0.116 | 851  | 759  | 8 | India          | Adani Power Limited                                         | TPP |
| 43.2455  | -79.8259 | 0.116 | 478  | 510  | 7 | Canada         | Hamilton industrial zone                                    | IND |
| 42.5104  | 124.0521 | 0.115 | 570  | 208  | 3 | China          | Kaiyuan                                                     | URB |
| 31.0156  | 31.3125  | 0.113 | 285  | 626  | 8 | Egypt          | Mansourah                                                   | URB |
| 22.9453  | 120.1953 | 0.111 | 626  | 646  | 8 | Taiwan         | Tainan                                                      | URB |
| 22.4063  | 87.8750  | 0.111 | 349  | 382  | 4 | India          | Kolaghat                                                    | TPP |
| 53.0729  | 80.3229  | 0.110 | 636  | 141  | 3 | Russia         | Outlier - Empty area                                        | OUT |
| 45.3563  | 9.9188   | 0.110 | 564  | 278  | 5 | Italy          | Outlier - Inconsistent emissions                            | OUT |
| 35.9896  | 115.1354 | 0.110 | 430  | 204  | 3 | China          | Outlier - Inconsistent emissions                            | OUT |
| 52.6354  | -1.1771  | 0.108 | 428  | 157  | 3 | United Kingdom | Leicester                                                   | URB |
| 51.8229  | 5.2396   | 0.106 | 184  | 150  | 3 | Netherlands    | Outlier - Inconsistent emissions                            | OUT |
| 22.0000  | 113.1875 | 0.103 | 512  | 356  | 4 | China          | Power station (unknown name)                                | TPP |
| 54.3313  | 38.2938  | 0.101 | 293  | 246  | 5 | Russia         | Outlier - Inconsistent emissions                            | OUT |
| 44.6354  | -81.3021 | 0.100 | 361  | 242  | 3 | Canada         | Outlier - Empty area                                        | OUT |
| 46.0938  | 127.3125 | 0.098 | 365  | 222  | 4 | China          | Outlier - Inconsistent emissions                            | OUT |
| -32.7813 | -71.4063 | 0.095 | 607  | 274  | 3 | Chile          | AES Gener - Termoeléctrica Ventanas                         | TPP |
| 53.4063  | -1.3438  | 0.093 | 416  | 179  | 3 | United Kingdom | Sheffield/Rotterdam                                         | URB |
| 35.8813  | 117.6688 | 0.090 | 486  | 326  | 5 | China          | Qingyun industrial zone                                     | IND |
| 35.0063  | 115.2063 | 0.089 | 158  | 349  | 5 | China          | Zhuangzhazhen industrial zone                               | IND |
| 55.0688  | 38.8313  | 0.088 | 344  | 265  | 5 | Russia         | Holcim Cement                                               | CEM |
| -26.6424 | 30.1076  | 0.087 | 731  | 1030 | 9 | South Africa   | Eskom - Camden                                              | TPP |
| 32.8021  | 35.0521  | 0.083 | 323  | 219  | 3 | Israel         | Haifa                                                       | URB |
| 58.2604  | -60.4271 | 0.083 | 234  | 173  | 3 | NO COUNTRY     | Outlier - Empty area                                        | OUT |
| 37.6250  | 105.7188 | 0.080 | 373  | 277  | 4 | China          | Ningxia Huaxia Spec. Steel Co.                              | STI |
| 37.2563  | 127.3938 | 0.075 | 2582 | 330  | 5 | South Korea    | Icheon                                                      | URB |
| 31.4313  | 119.4438 | 0.068 | 391  | 383  | 5 | China          | Lichengzhen                                                 | URB |
| 34.6188  | 119.1438 | 0.068 | 205  | 349  | 5 | China          | Lianyingang                                                 | URB |
| 11.1813  | 79.0813  | 0.067 | 430  | 455  | 5 | India          | Dalmia Cement                                               | CEM |
| 26.5104  | 119.6979 | 0.067 | 246  | 266  | 3 | China          | Baogang Desheng Company                                     | STI |
| 20.2813  | 78.9688  | 0.066 | 384  | 298  | 3 | India          | Sai Wardha                                                  | TPP |
| 50.8750  | 4.4063   | 0.063 | 337  | 538  | 8 | Belgium        | Bruxelles                                                   | URB |
| 36.1563  | 117.0938 | 0.060 | 264  | 364  | 5 | China          | Tai'an                                                      | URB |
| 41.9688  | -87.2656 | 0.059 | 915  | 241  | 4 | United States  | Outlier - Empty area                                        | OUT |
| 31.9563  | 44.6938  | 0.059 | 801  | 401  | 5 | Iraq           | Diwanayah                                                   | TPP |
| 20.4896  | 106.5104 | 0.057 | 424  | 754  | 9 | Vietnam        | Nhà Máy Nhiệt Điện Thái Bình 2                              | TPP |
| 35.8281  | 116.0234 | 0.057 | 155  | 543  | 8 | China          | Outlier - Inconsistent emissions                            | OUT |
| 31.0833  | 119.6563 | 0.049 | 841  | 464  | 6 | China          | Huzhou Xinhuai S Cement Co.                                 | CEM |
| 18.3854  | 79.8021  | 0.049 | 345  | 260  | 3 | India          | Kakatiya                                                    | TPP |
| 45.9152  | 127.1473 | 0.049 | 337  | 472  | 7 | China          | Outlier - Inconsistent emissions                            | OUT |
| 31.8021  | 35.1979  | 0.048 | 199  | 219  | 3 | Israel         | Jerusalem                                                   | URB |
| 25.6563  | 50.7188  | 0.047 | 548  | 242  | 3 | Qatar          | Outlier - Empty area                                        | OUT |
| 29.4271  | 55.6979  | 0.045 | 461  | 217  | 3 | Iran           | Sirjian                                                     | URB |

|          |          |        |      |     |   |               |                                                             |     |
|----------|----------|--------|------|-----|---|---------------|-------------------------------------------------------------|-----|
| -34.8958 | -57.9688 | 0.044  | 429  | 538 | 6 | Argentina     | La Plata                                                    | URB |
| 52.6250  | 76.5781  | 0.042  | 811  | 563 | 8 | Kazakhstan    | Outlier - Empty area                                        | OUT |
| 35.5104  | 118.7326 | 0.041  | 511  | 613 | 9 | China         | Cement plant (unknown name)                                 | CEM |
| 42.3750  | -88.0000 | 0.038  | 251  | 266 | 4 | United States | Waukegan/Gurnee                                             | URB |
| 56.4167  | 37.3646  | 0.038  | 215  | 316 | 6 | Russia        | Outlier - Inconsistent emissions                            | OUT |
| 24.0625  | 91.0000  | 0.036  | 355  | 379 | 4 | Bangladesh    | Midland PP & Ashuganj Fertilizer & Chemical Company Limited | TPP |
| 54.2708  | 39.5104  | 0.036  | 264  | 301 | 6 | Russia        | Outlier - Empty area                                        | OUT |
| 33.9896  | 113.8021 | 0.036  | 199  | 198 | 3 | China         | Xuchang                                                     | URB |
| 23.5848  | 113.1027 | 0.035  | 1017 | 547 | 7 | China         | Outlier - Inconsistent emissions                            | OUT |
| 52.4375  | 75.9375  | 0.035  | 406  | 410 | 6 | Kazakhstan    | Impossible to characterize                                  | OTH |
| 29.5000  | -95.6250 | 0.035  | 234  | 299 | 4 | United States | NRG Texas Power LLC                                         | TPP |
| 59.8021  | 30.9896  | 0.034  | 184  | 121 | 3 | Russia        | Outlier - Inconsistent emissions                            | OUT |
| 31.7396  | 119.6771 | 0.033  | 695  | 237 | 3 | China         | Industrial zone (unknown name)                              | IND |
| 41.4297  | 122.4141 | 0.031  | 339  | 510 | 8 | China         | Anshan Shunda Compound Fertilizer Chang                     | OTH |
| 29.8594  | 52.7656  | 0.030  | 395  | 347 | 4 | Iran          | Ammonia plant & Shiraz Methanol Plant                       | OTH |
| 54.3359  | 86.7891  | 0.028  | 207  | 396 | 8 | Russia        | Karakan mining site                                         | MIN |
| 52.0521  | 7.0521   | 0.025  | 122  | 153 | 3 | Germany       | Outlier - Inconsistent emissions                            | OUT |
| 35.1979  | 114.6424 | 0.024  | 137  | 608 | 9 | China         | Chengguan                                                   | URB |
| 29.9563  | 120.0813 | 0.020  | 695  | 347 | 5 | China         | Outlier - Inconsistent emissions                            | OUT |
| 27.1563  | 49.1438  | 0.020  | 381  | 401 | 5 | Saudi Arabia  | Eastern Province Cement Company                             | CEM |
| 23.2188  | 90.6563  | 0.020  | 339  | 589 | 7 | Bangladesh    | Desh Energy Chandpur                                        | TPP |
| 26.8813  | 55.9563  | 0.020  | 299  | 450 | 5 | Iran          | Qeshm Cement Factory                                        | CEM |
| 35.8750  | 116.3984 | 0.020  | 138  | 551 | 8 | China         | Rising Chemical Group                                       | OTH |
| 54.1920  | 87.1384  | 0.019  | 158  | 359 | 7 | Russia        | Taldinskiy mining site                                      | MIN |
| 32.3021  | 118.3854 | 0.018  | 197  | 249 | 3 | China         | Chuzhou                                                     | URB |
| 56.0469  | 36.7344  | 0.018  | 127  | 222 | 4 | Russia        | Outlier - Inconsistent emissions                            | OUT |
| 30.2917  | 121.9688 | 0.016  | 219  | 587 | 6 | China         | Dayushan island                                             | OTH |
| 35.3021  | 115.1354 | 0.012  | 114  | 195 | 3 | China         | Dongzhuang industrial zone                                  | IND |
| 36.9479  | 127.4271 | 0.010  | 210  | 272 | 3 | South Korea   | Urban area (unknown name)                                   | URB |
| 35.3125  | 117.9063 | 0.010  | 119  | 269 | 4 | China         | Power station (unknown name)                                | TPP |
| 30.2188  | 30.7188  | 0.008  | 1811 | 210 | 3 | Egypt         | Outlier - Inconsistent emissions                            | OUT |
| 30.1875  | 121.1250 | 0.007  | 150  | 302 | 4 | China         | Outlier - Inconsistent emissions                            | OUT |
| 40.9792  | 110.1146 | 0.006  | 301  | 433 | 6 | China         | Baotou                                                      | TPP |
| 30.2813  | 121.2813 | 0.006  | 137  | 214 | 3 | China         | Cixi Ningbo industrial zone                                 | IND |
| 55.3229  | 37.1771  | 0.005  | 1167 | 166 | 3 | Russia        | Outlier - Inconsistent emissions                            | OUT |
| 30.1771  | 121.4271 | 0.003  | 117  | 227 | 3 | China         | Guanhaiweizhen                                              | URB |
| 41.4938  | 122.7688 | 0.002  | 117  | 332 | 5 | China         | Industrial zone (unknown name)                              | IND |
| 52.2188  | 4.4375   | 0.002  | 82   | 227 | 4 | Netherlands   | Noordwijk                                                   | URB |
| 33.7500  | 44.6250  | 0.000  | 116  | 288 | 4 | Iraq          | Bakouba                                                     | URB |
| 37.8047  | 116.5781 | -0.001 | 137  | 509 | 8 | China         | Outlier - Inconsistent emissions                            | OUT |
| 36.0781  | 115.0156 | -0.012 | 184  | 252 | 4 | China         | Outlier - Inconsistent emissions                            | OUT |
| 30.5688  | 31.4563  | -0.082 | 975  | 369 | 5 | Egypt         | Zagazig                                                     | URB |

Table S2: List of point sources with number of pixels within the corresponding cluster, mean latitude and longitude, total daily NO<sub>x</sub> emissions using the flux-divergence method, corresponding emissions using a Gaussian fit and value of the correlation coefficient for the fit. The corresponding emitter is identified, as well the sector probably accounting for the majority of the emissions within the emitter (seven categories are considered: urban (URB), mining (MIN), iron and steel (STI), cement (CEM), power generation (TPP), other (OTH) and different types of outliers (OUT)). The list is ordered by decreasing values of  $R^2$ .
